# Supplementary material for: Palladium-Catalyzed Direct (Het)arylation Reactions of Benzo[1,2-d:4,5-d′]bis([1,2,3]thiadiazole and 4,8-Dibromobenzo[1,2-d:4,5-d′]bis([1,2,3]thiadiazole)
Source: MDPI journal article supplement (doi:10.3390/molecules28093977), 2023-05-08

## Supplementary Materials

### **Palladium-catalyzed direct (het)arylation reactions of benzo[1,2-*d*:4,5-*d'*]bis([1,2,3]thiadiazole and 4,8-dibromobenzo[1,2-*d*:4,5-*d'*]bis([1,2,3]thiadiazole)**

**Timofey N. Chmovzh<sup>1,2</sup>, Timofey A. Kudryashev<sup>1,3</sup>, Daria A. Alekhina<sup>1,4</sup> and Oleg A. Rakitin<sup>1\*</sup>**

<sup>1</sup> *N. D. Zelinsky Institute of Organic Chemistry, Russian Academy of Sciences, 119991 Moscow, Russian Federation; orakitin@ioc.ac.ru (O.A.R.); tim1661@yandex.ru (T.N.C.);*

<sup>2</sup> *Nanotechnology Education and Research Center, South Ural State University, 454080 Chelyabinsk, Russia; chmovzhtn@susu.ru (T.N.C.);*

<sup>3</sup> *Department of Chemistry, Moscow State University, 119899 Moscow, Russia*

<sup>4</sup> *Higher Chemical College, Mendeleev University of Chemical Technology of Russia, Miusskaya Sq. 9, 125047 Moscow, Russia*

\* *Correspondence: orakitin@ioc.ac.ru; Tel.: +7 499 135 5327*

#### **Table of contents:**

|                                                          |           |
|----------------------------------------------------------|-----------|
| <b><sup>1</sup>H and <sup>13</sup>C NMR spectra.....</b> | <b>S2</b> |
|----------------------------------------------------------|-----------|

# 4-Bromo-8-(5-(2-ethylhexyl)thiophen-2-yl)benzo[1,2-d:4,5-d']bis([1,2,3]thiadiazole) (4a)

## $^1\text{H}$ NMR (300 MHz)

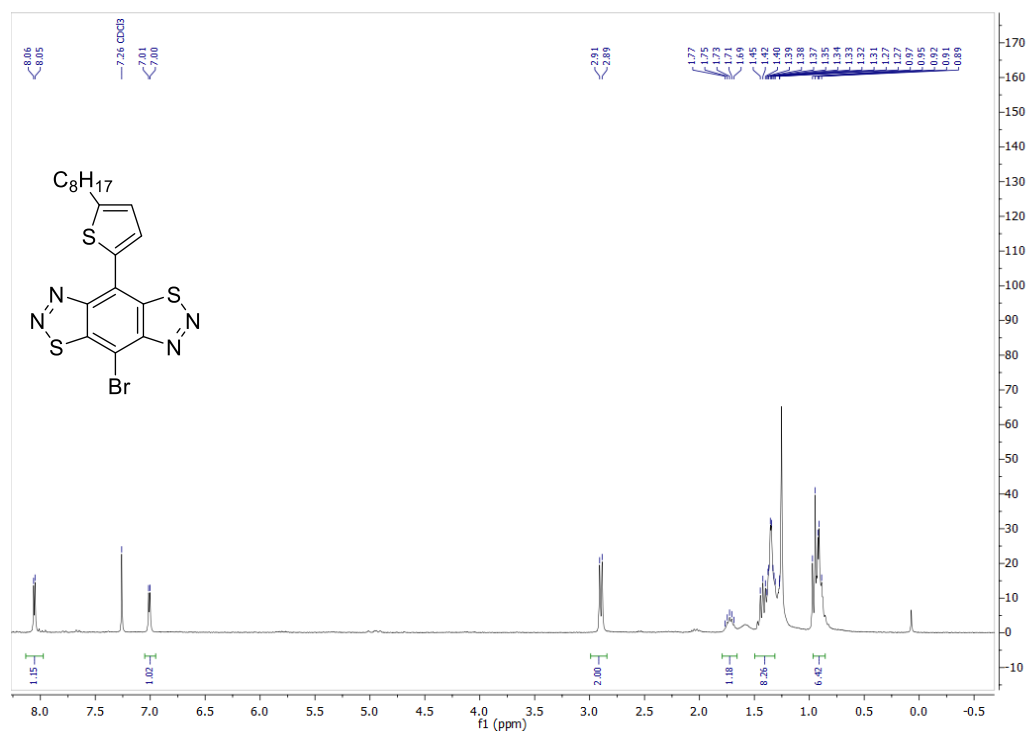

## $^{13}\text{C}$ NMR (75 MHz)

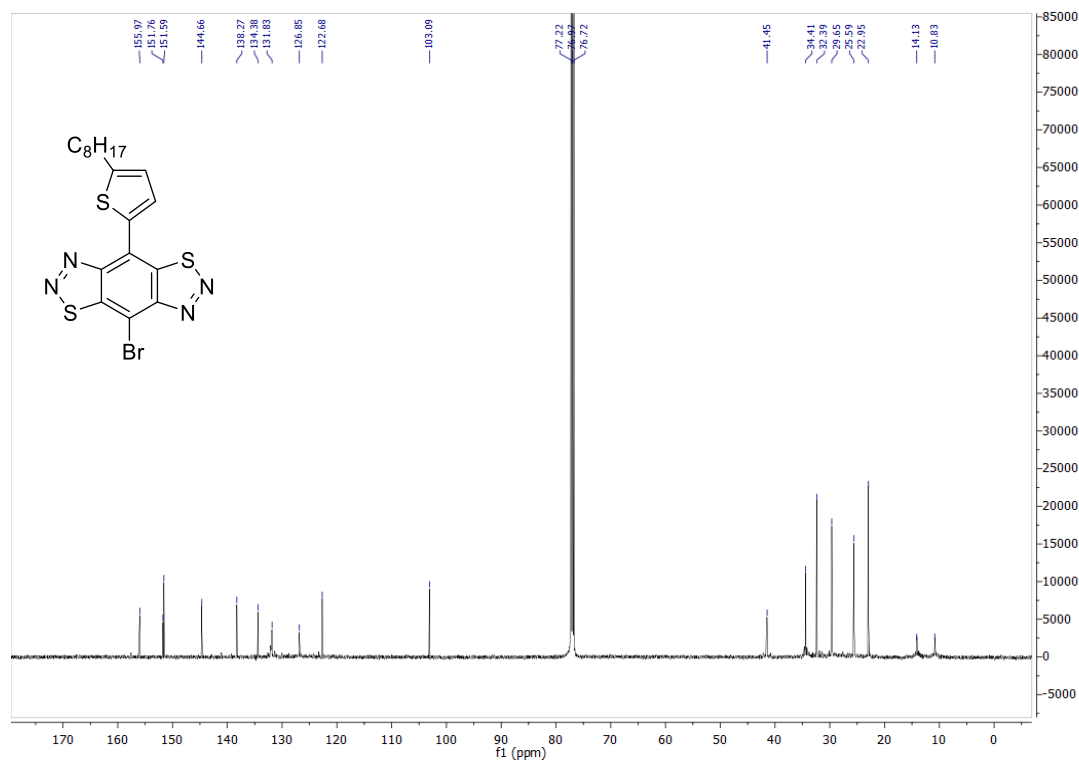

# 4-Bromo-8-(thiophen-2-yl)benzo[1,2-d:4,5-d']bis([1,2,3]thiadiazole) (4b)

## <sup>1</sup>H NMR (300 MHz)

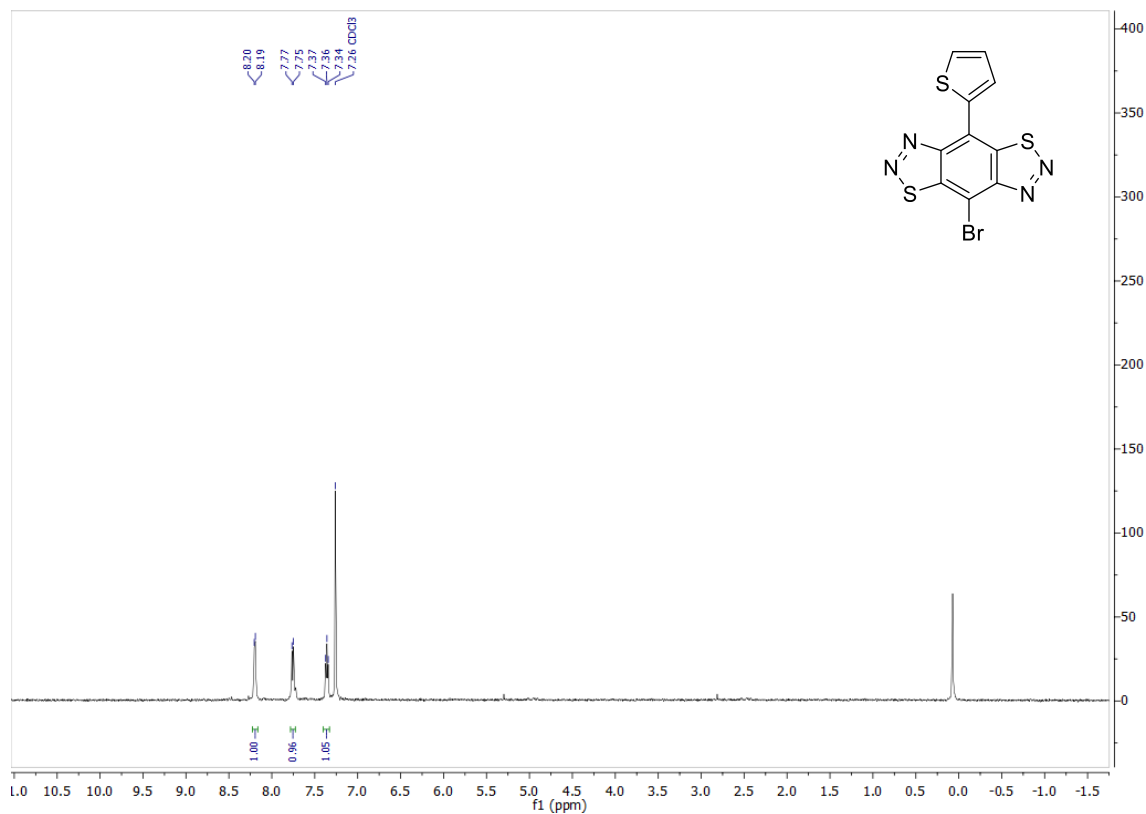

## <sup>13</sup>C NMR (75 MHz)

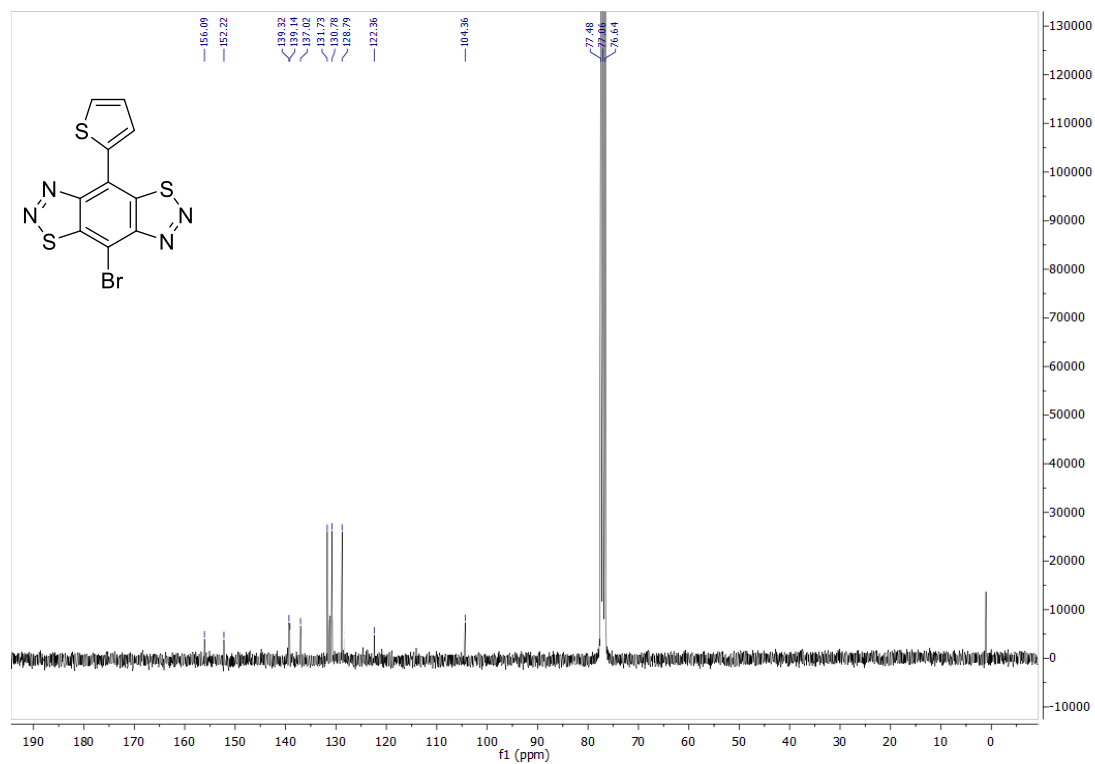

# 4-Bromo-8-(4-hexylthiophen-2-yl)benzo[1,2-d:4,5-d']bis([1,2,3]thiadiazole) (4c)

## <sup>1</sup>H NMR (300 MHz)

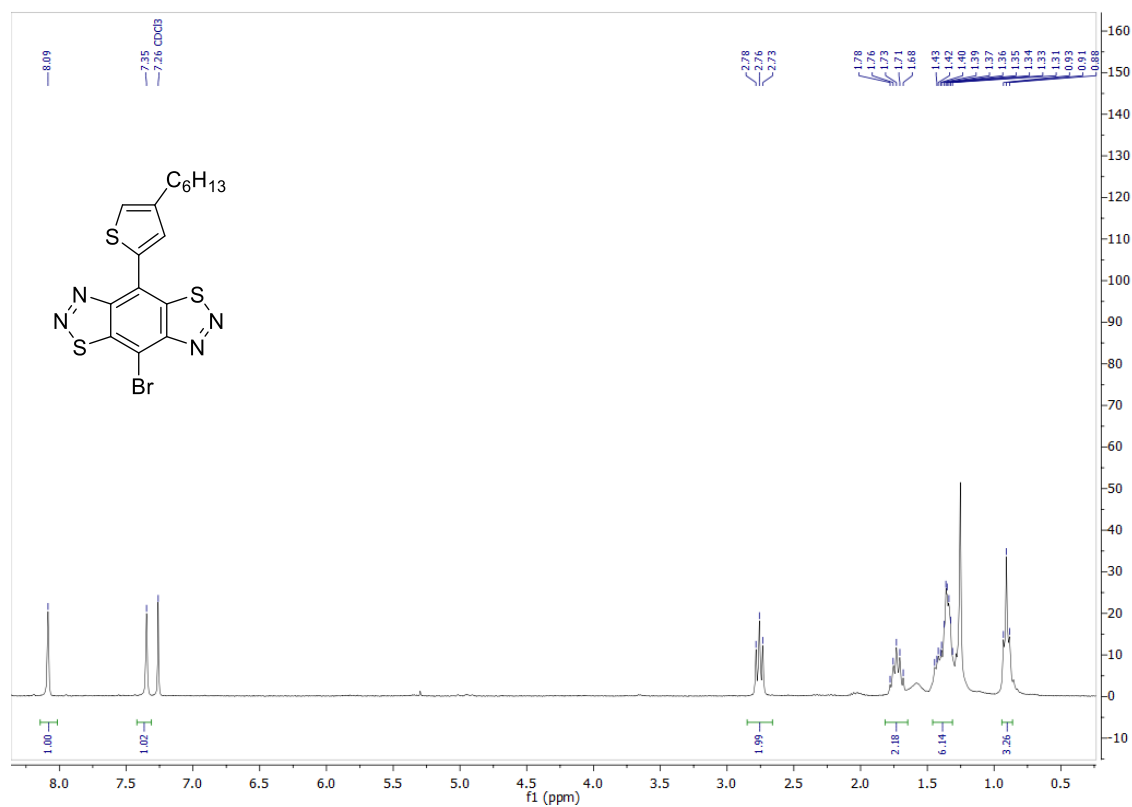

## <sup>13</sup>C NMR (75 MHz)

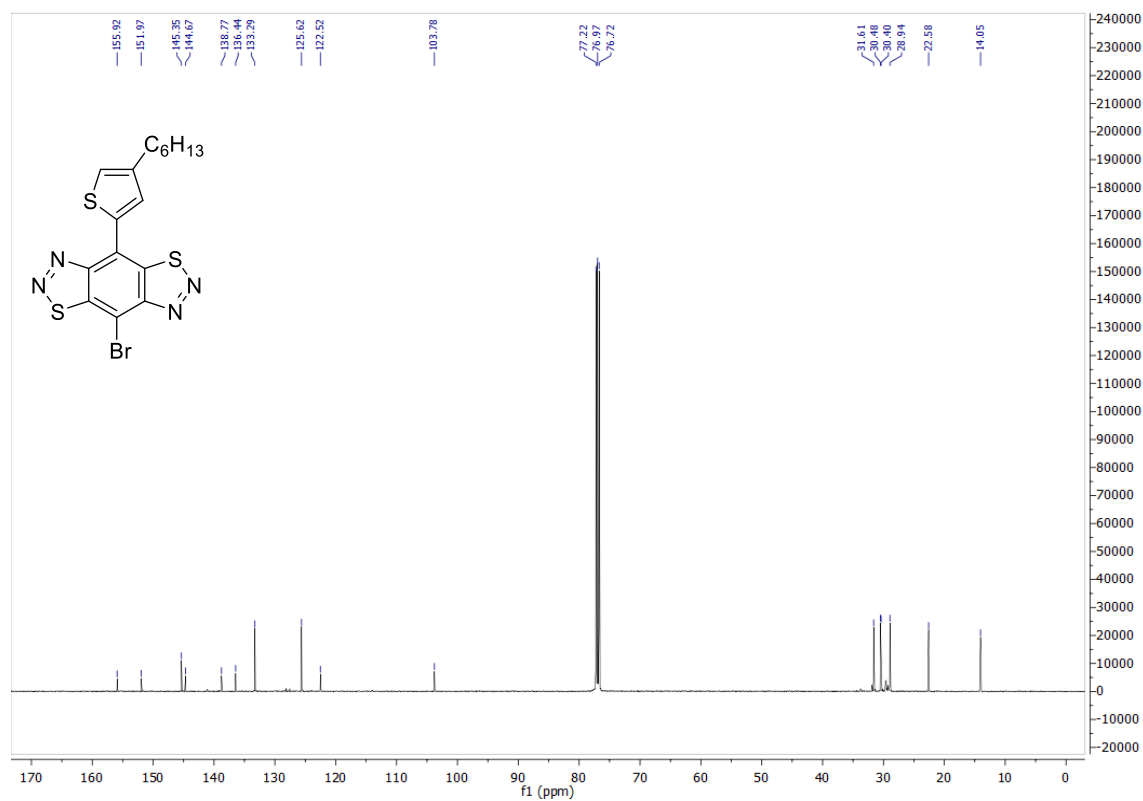

# 4-([2,2'-Bithiophen]-5-yl)-8-bromobenzo[1,2-d:4,5-d']bis([1,2,3]thiadiazole) (4d)

## <sup>1</sup>H NMR (300 MHz)

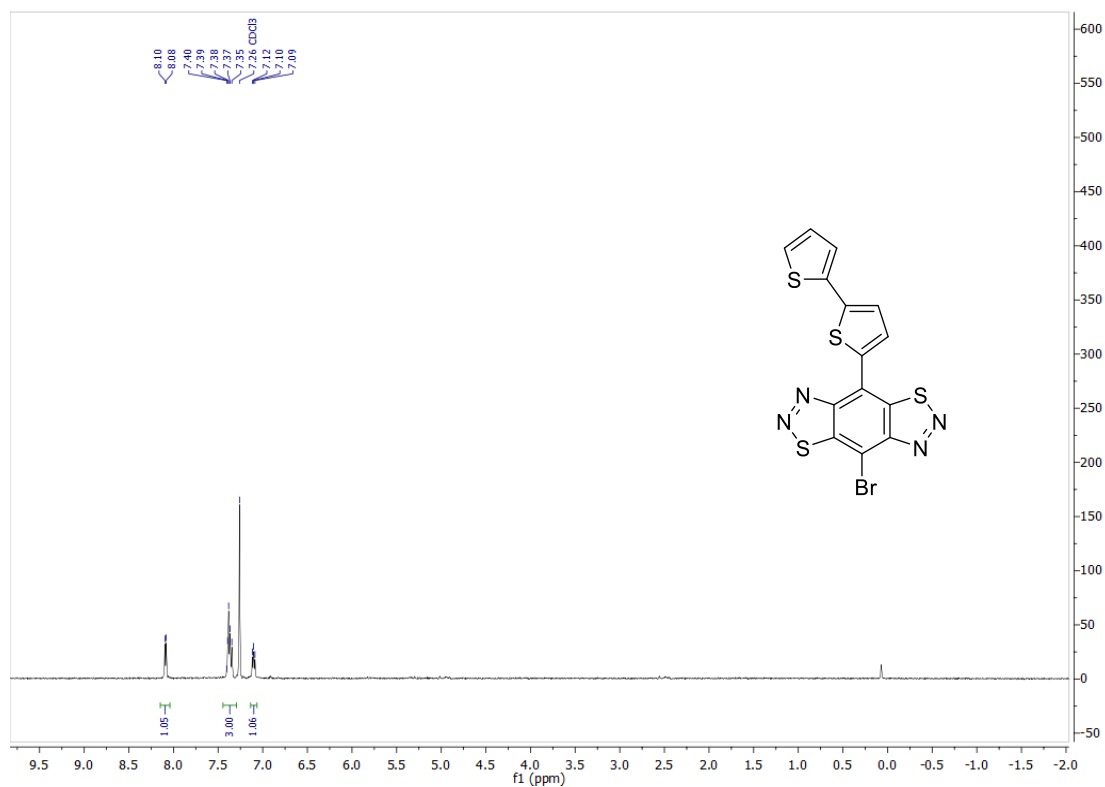

## <sup>13</sup>C NMR (75 MHz)

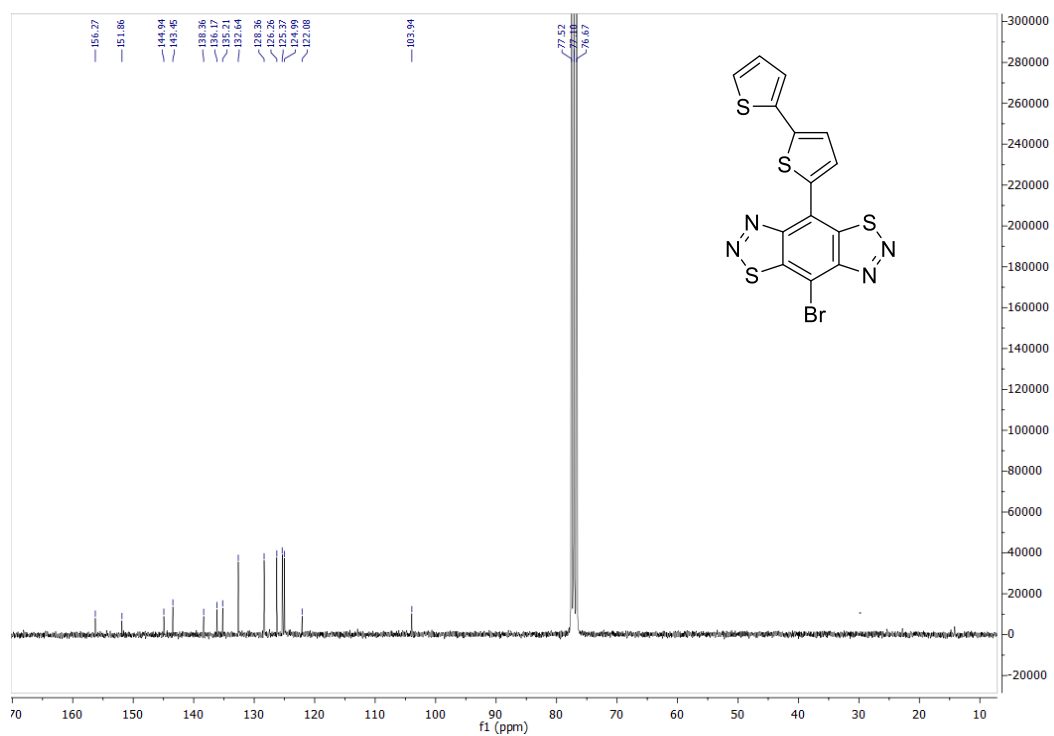

# 4,8-Bis(4-hexylthiophen-2-yl)benzo[1,2-d:4,5-d']bis([1,2,3]thiadiazole) (5a)

## <sup>1</sup>H NMR (300 MHz)

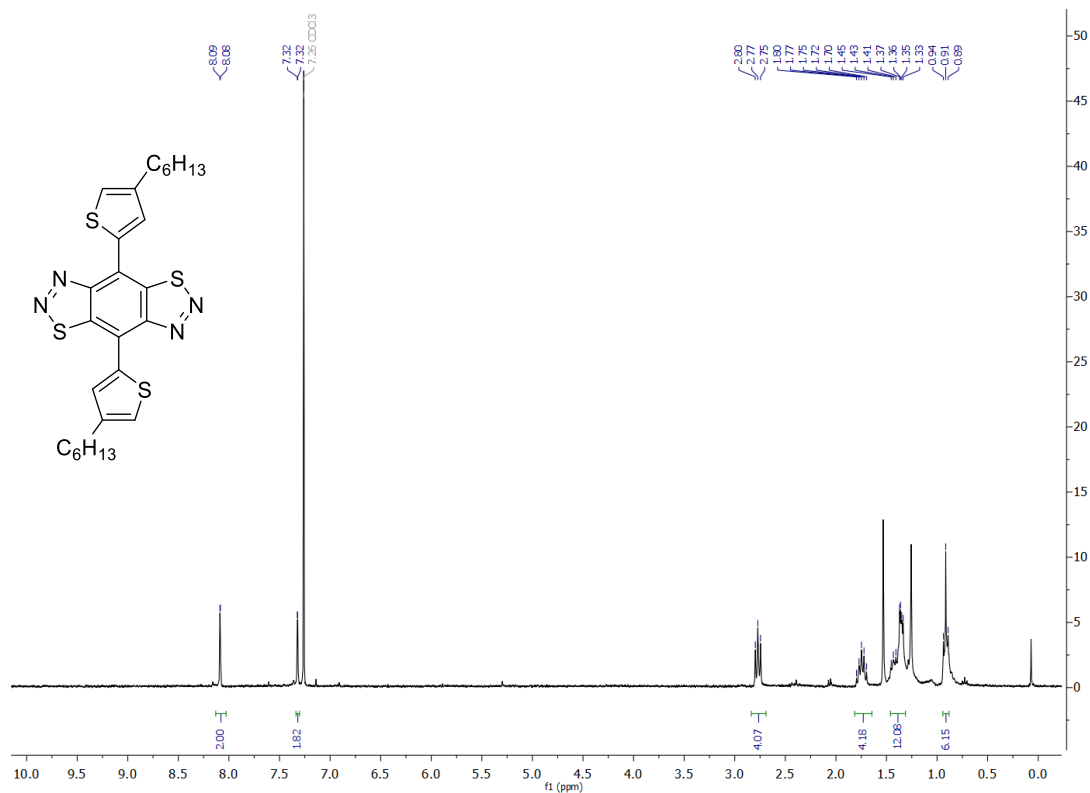

## <sup>13</sup>C NMR (75 MHz)

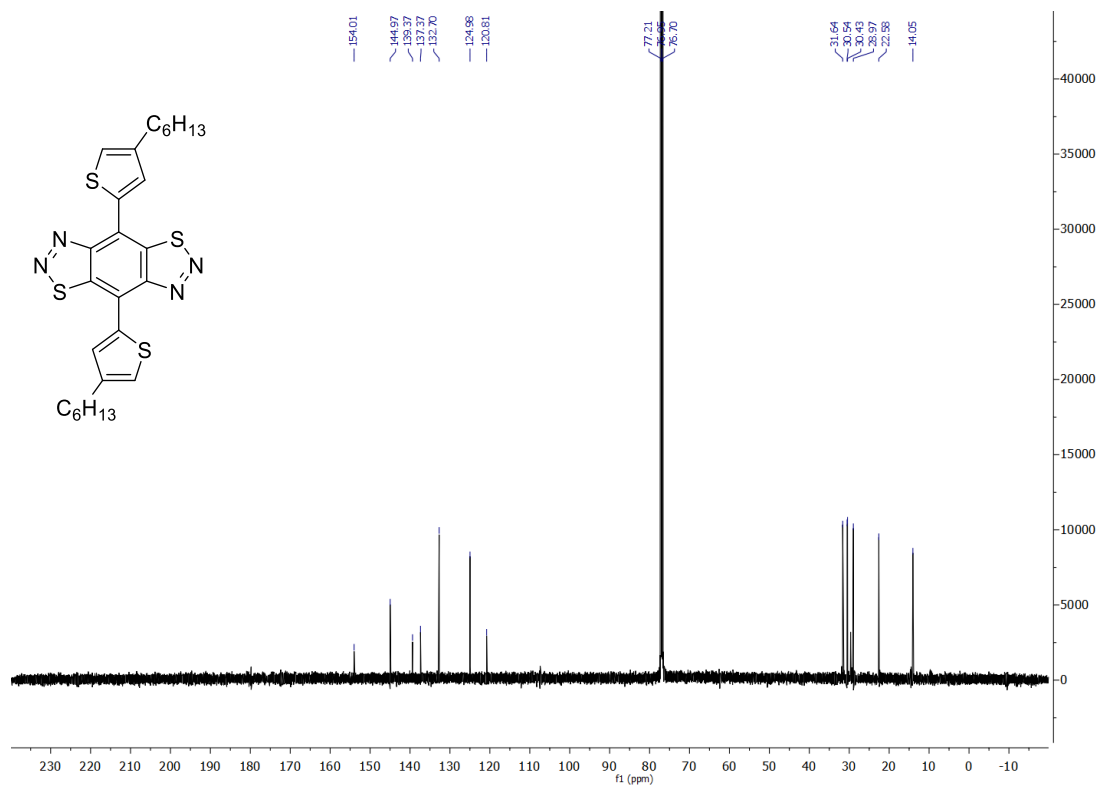

**4,8-Di(thiophen-2-yl)benzo[1,2-d:4,5-d']bis([1,2,3]thiadiazole) (5b)**

**<sup>1</sup>H NMR (300 MHz)**

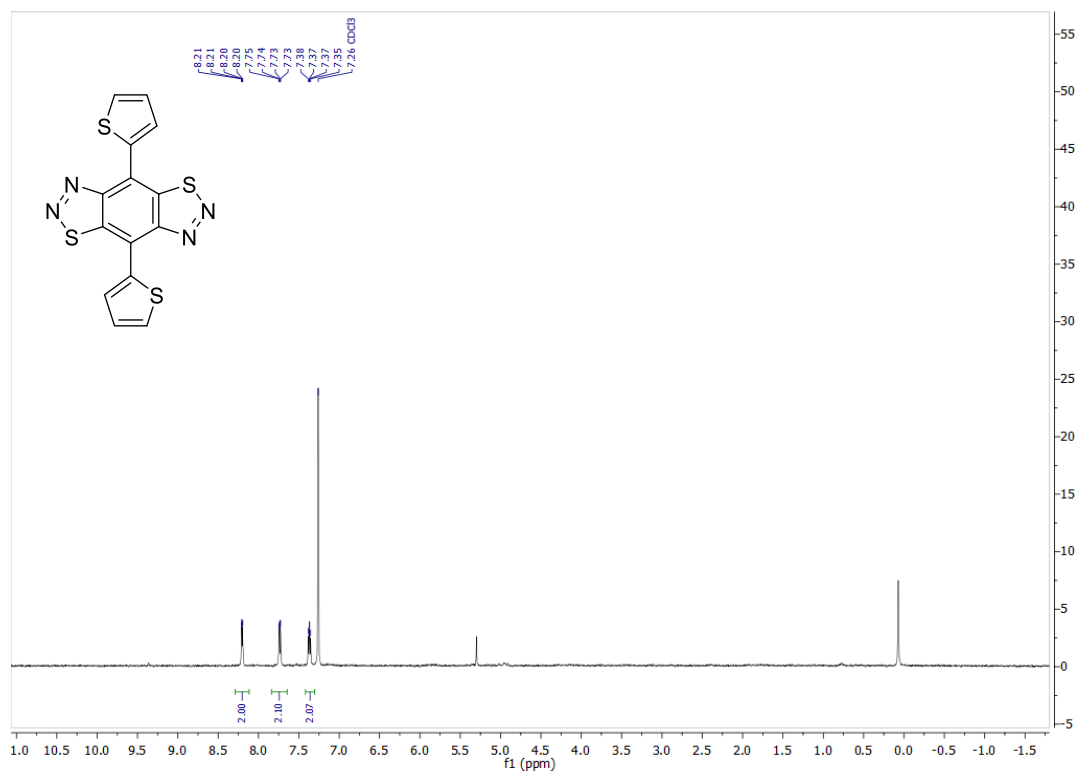

**<sup>13</sup>C NMR(75 MHz)**

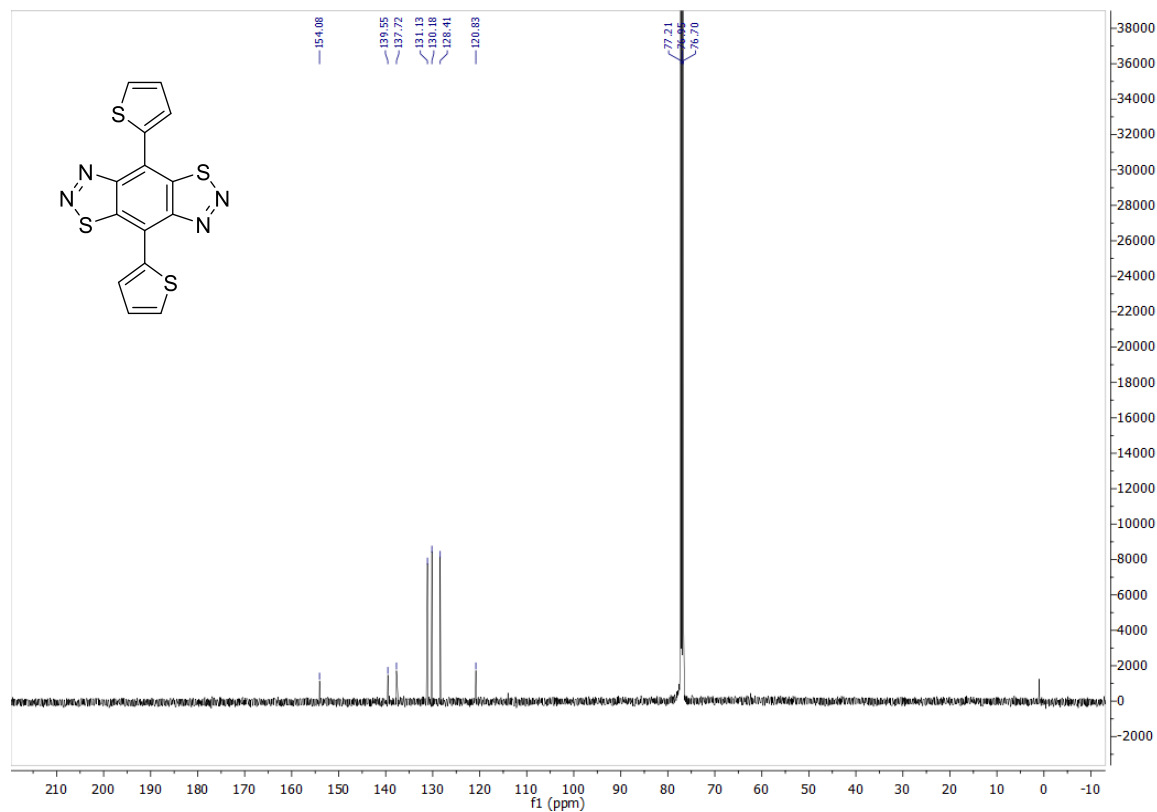

# 4,8-Bis(4-hexylthiophen-2-yl)benzo[1,2-d:4,5-d']bis([1,2,3]thiadiazole) (5c)

## <sup>1</sup>H NMR (300 MHz)



## <sup>13</sup>C NMR (75 MHz)





# 4,8-Di([2,2'-bithiophen]-5-yl)benzo[1,2-d:4,5-d']bis([1,2,3]thiadiazole) (5d)

## <sup>1</sup>H NMR (300 MHz)

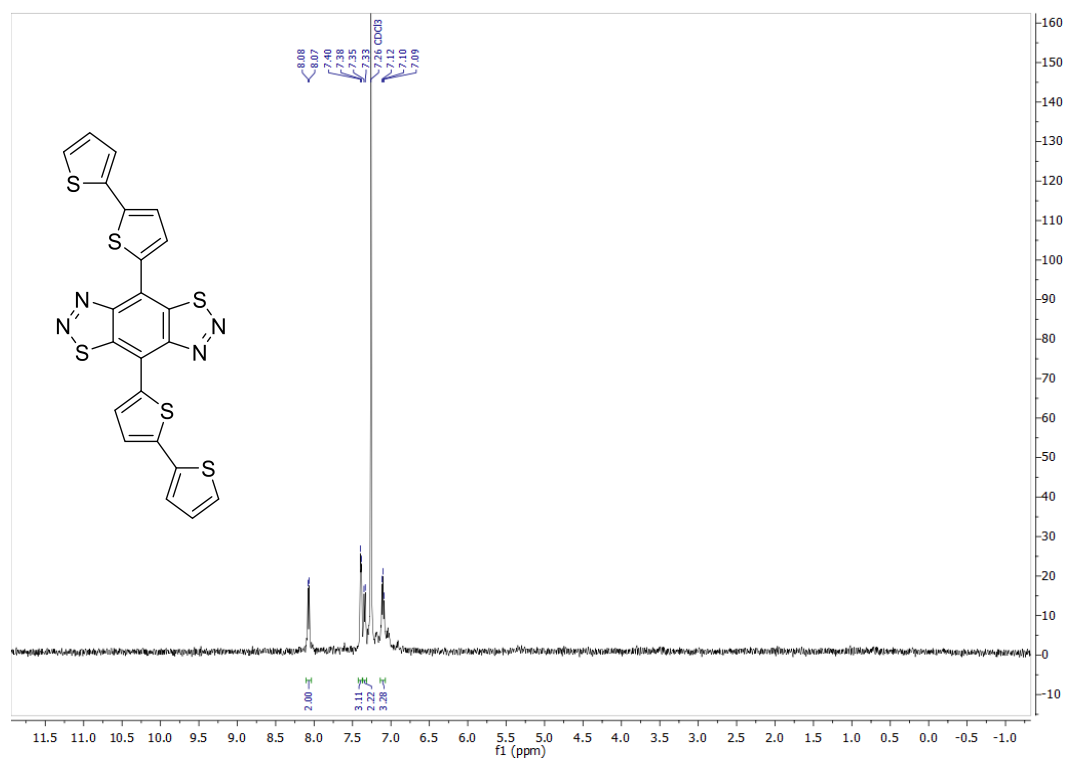

## <sup>13</sup>C NMR(75 MHz)

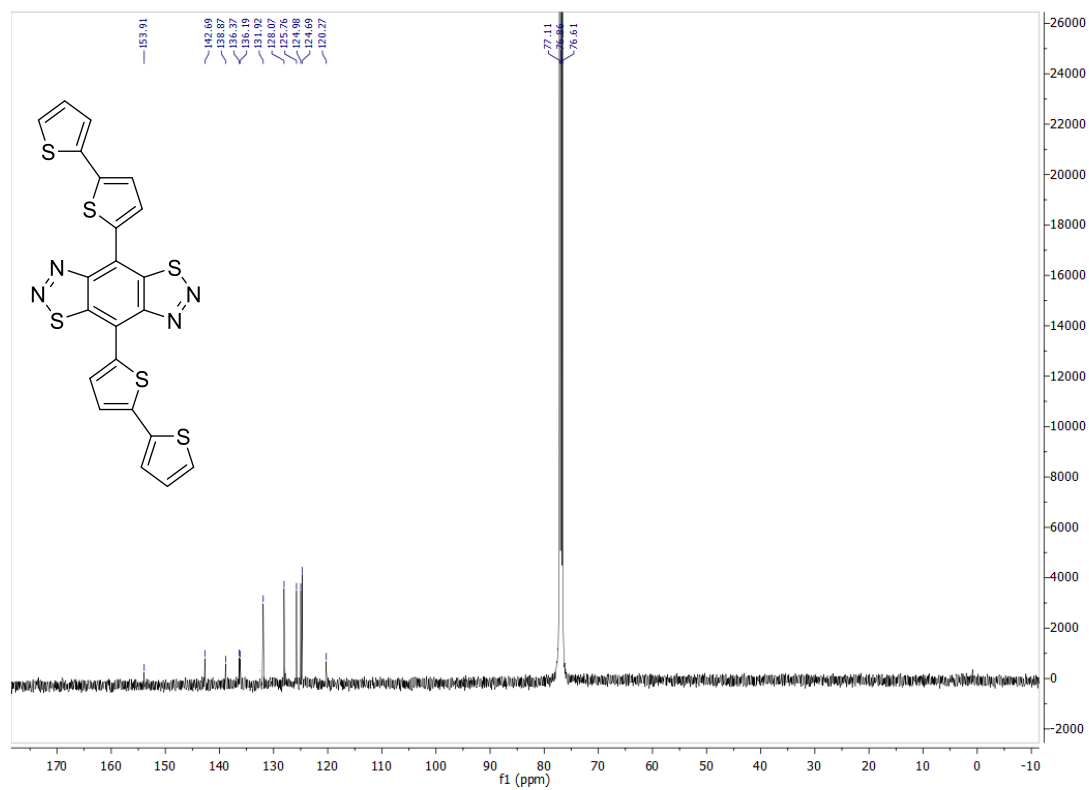

**4,8-Bis(5'-(trimethylsilyl)-[2,2'-bithiophen]-5-yl)benzo[1,2-*d*:4,5-*d'*]bis([1,2,3]thiadiazole)  
(5e)**

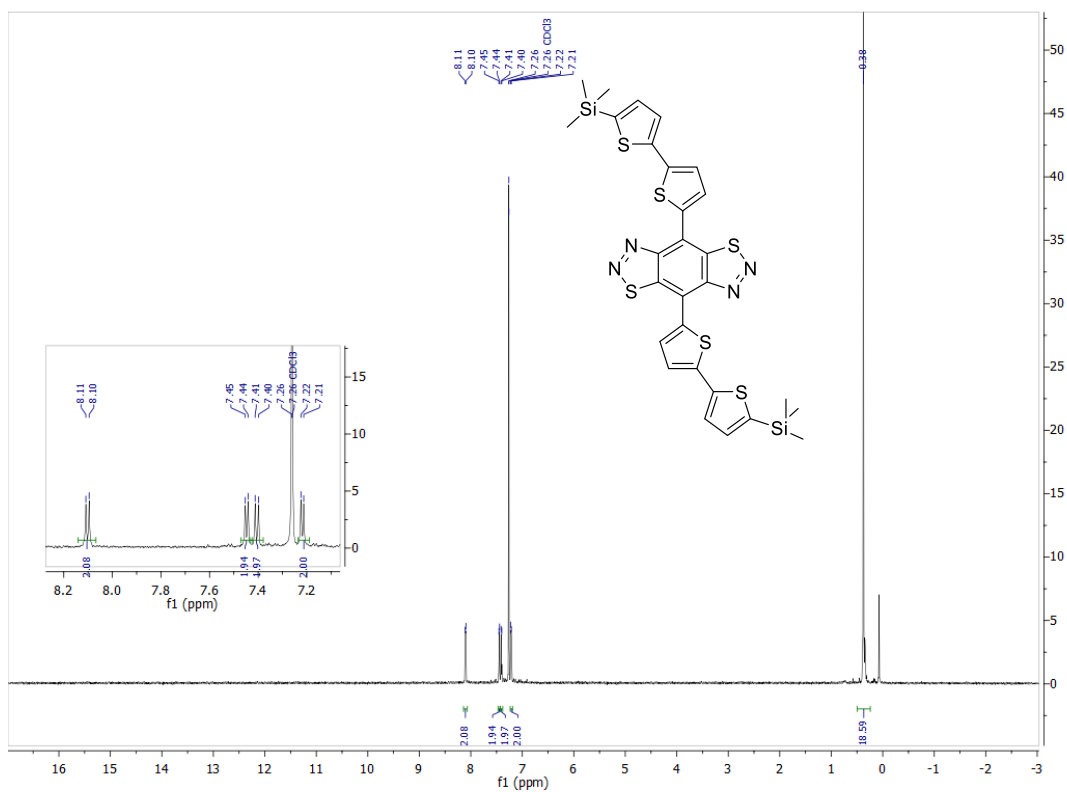

**<sup>13</sup>C NMR(75 MHz)**

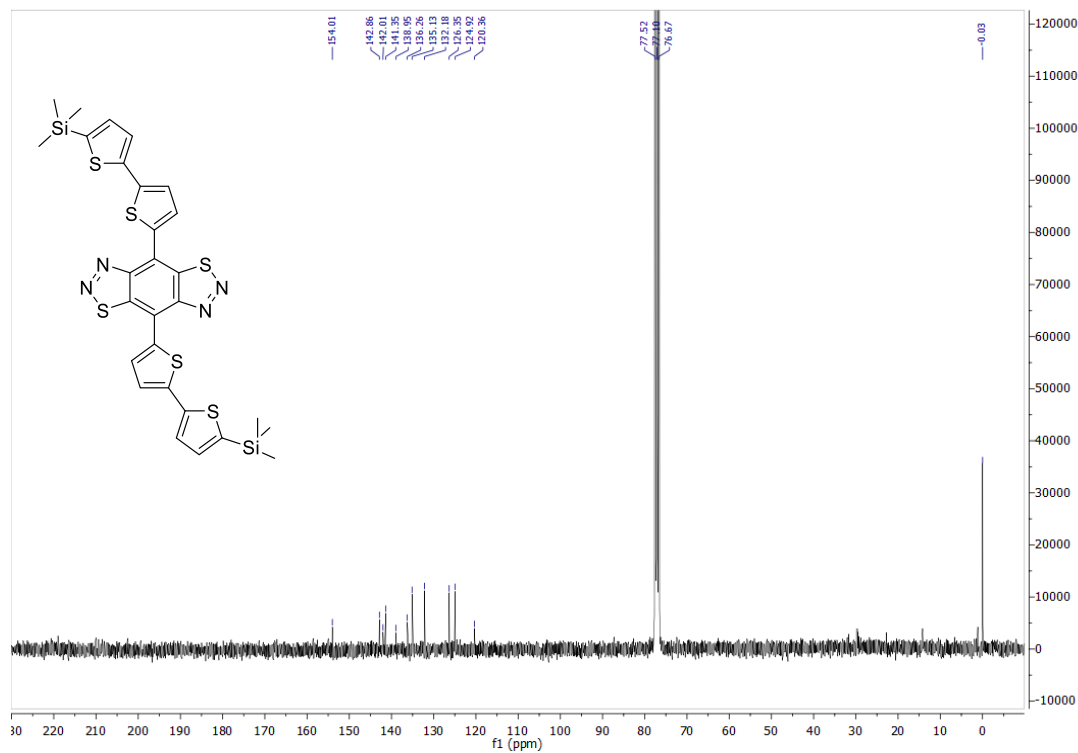

# 4,8-Diphenylbenzo[1,2-d:4,5-d']bis([1,2,3]thiadiazole) (5f)

## <sup>1</sup>H NMR (300 MHz)

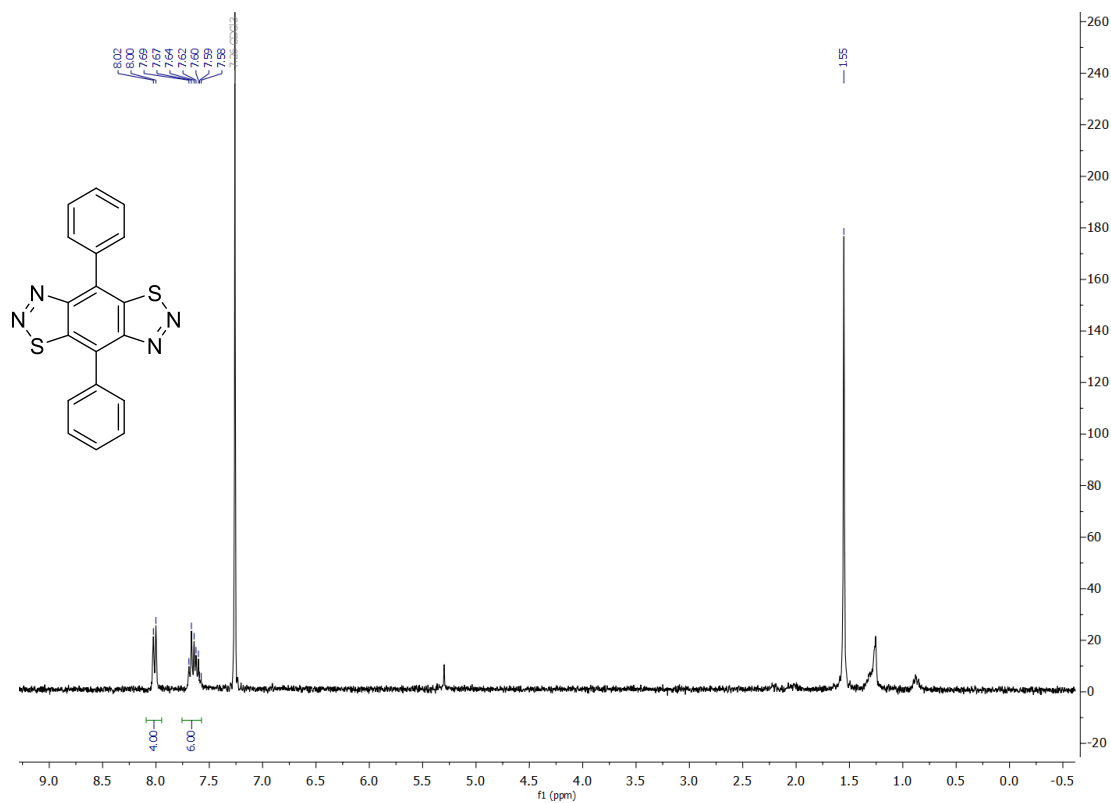

## <sup>13</sup>C NMR(75 MHz)

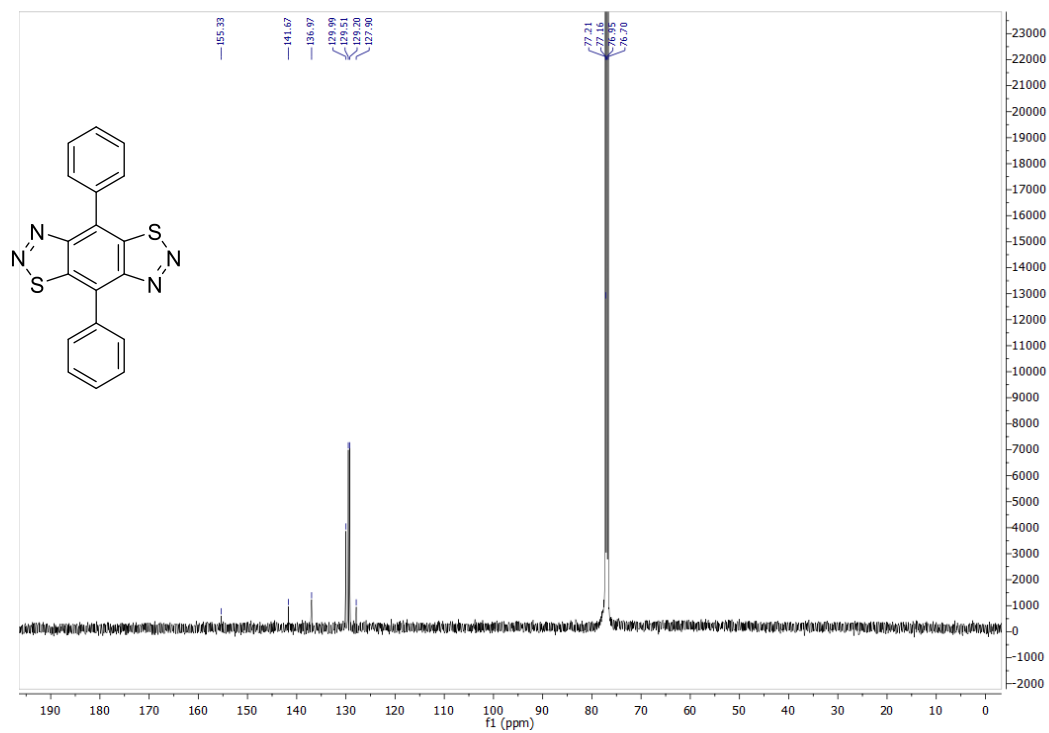

# 4,8-Di-p-tolylbenzo[1,2-d:4,5-d']bis([1,2,3]thiadiazole) (5g)

## <sup>1</sup>H NMR (300 MHz)

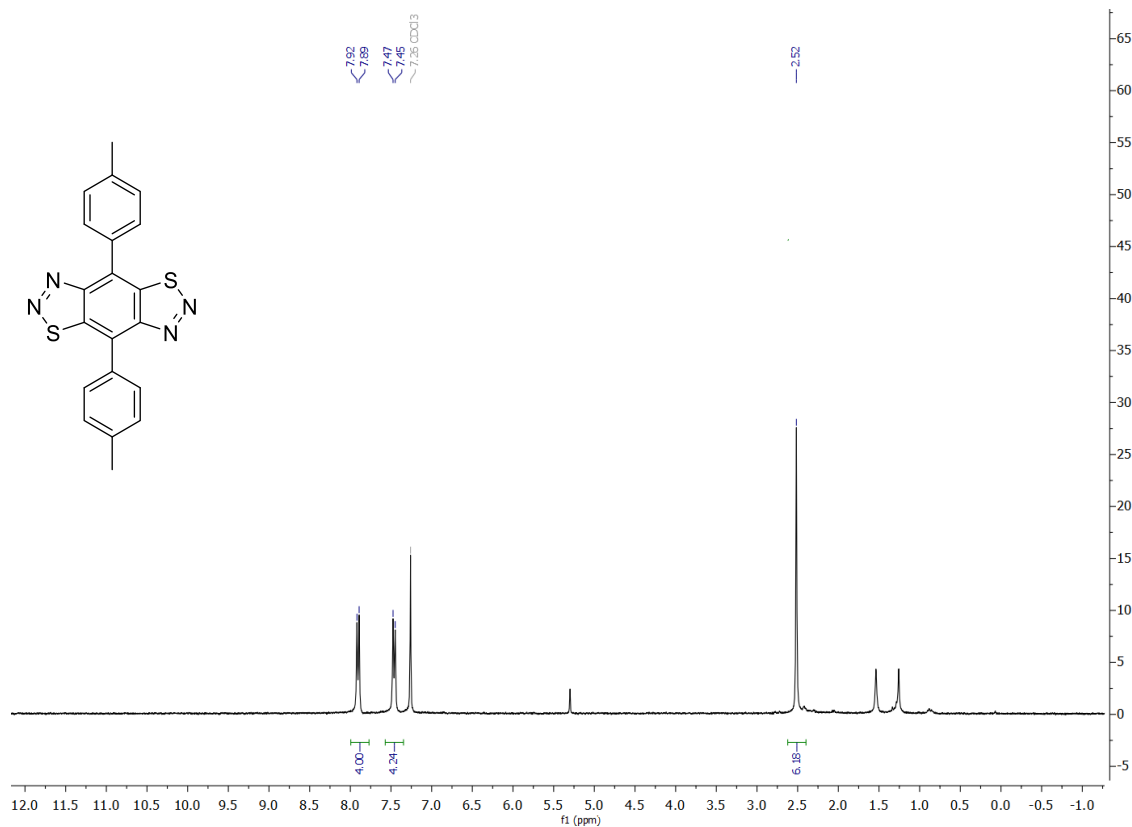

## <sup>13</sup>C NMR (75 MHz)

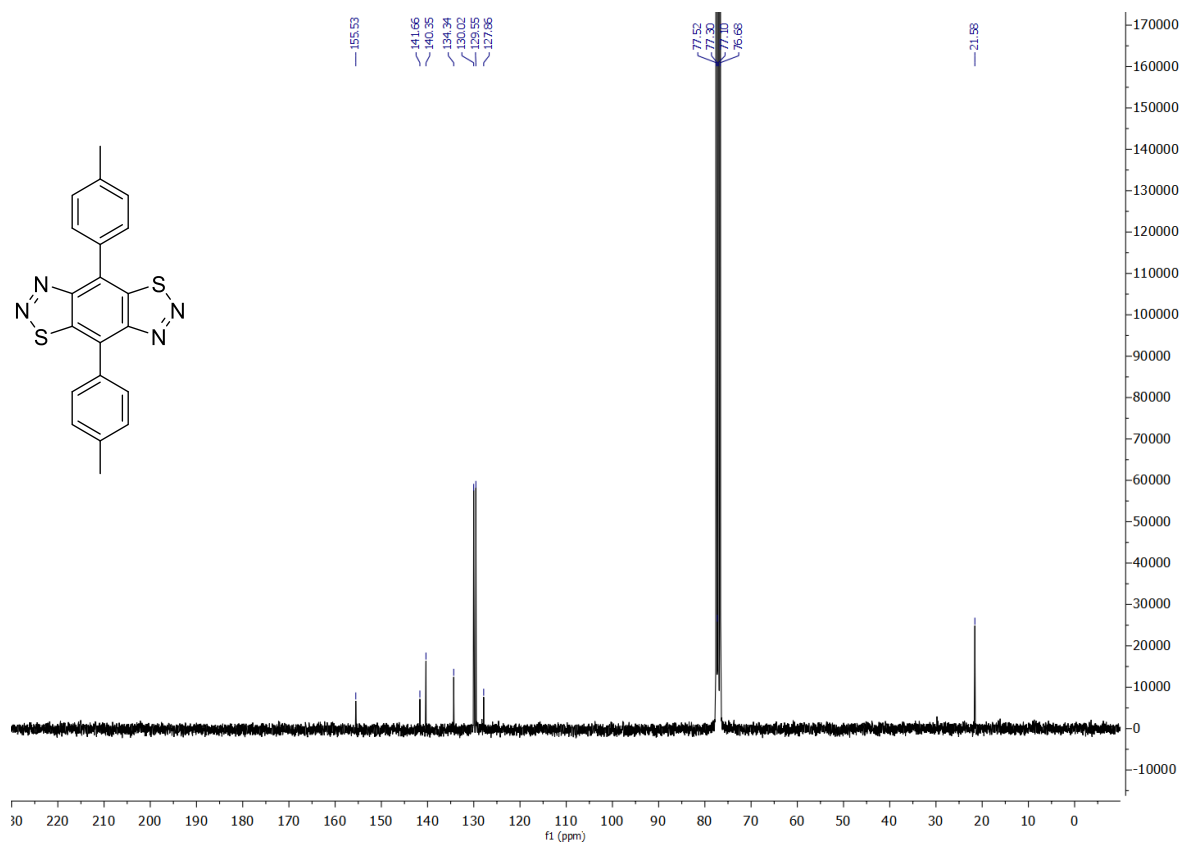

**4,8-Bis(4-methoxyphenyl)benzo[1,2-d:4,5-d']bis([1,2,3]thiadiazole) (5h)**

**<sup>1</sup>H NMR (300 MHz)**

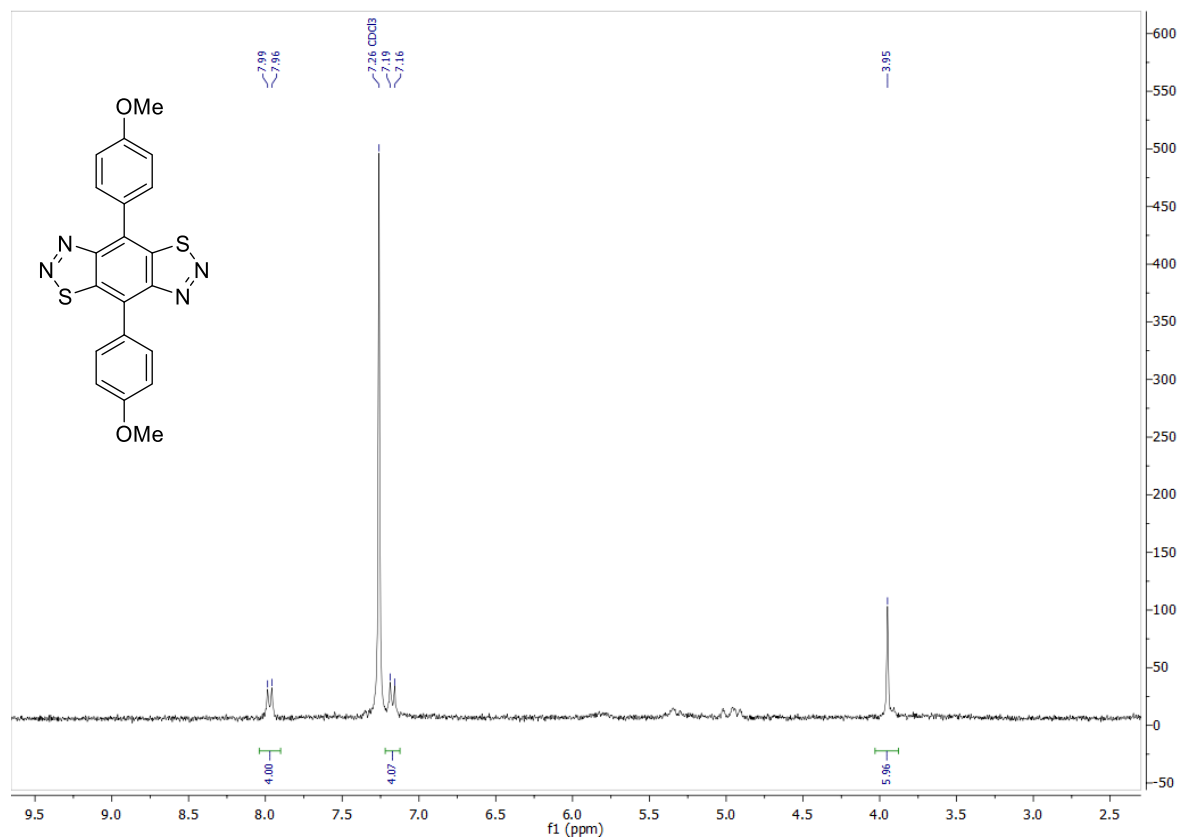

**Dimethyl 4,4'-(benzo[1,2-*d*:4,5-*d'*]bis([1,2,3]thiadiazole)-4,8-diyl)dibenzoate (5i)**

**<sup>1</sup>H NMR (300 MHz)**

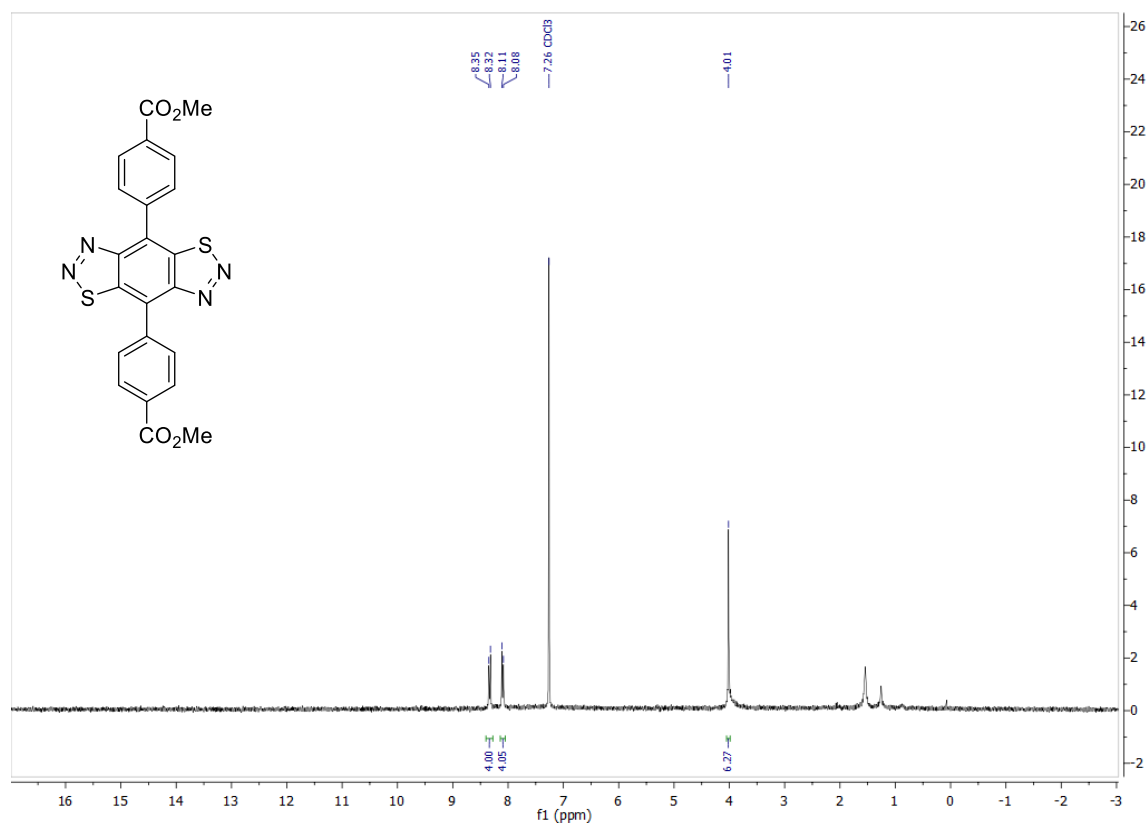

**<sup>13</sup>C NMR (75 MHz)**

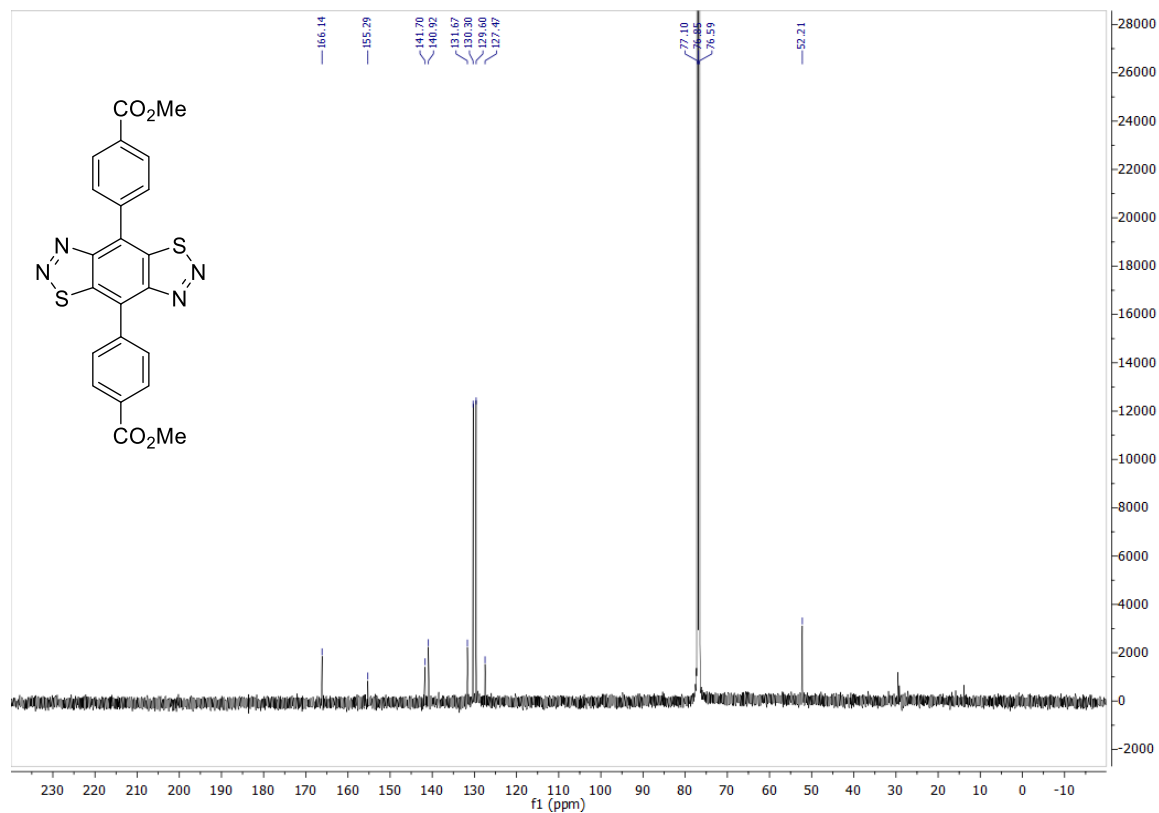

**4,4'-(Benzo[1,2-d:4,5-d']bis([1,2,3]thiadiazole)-4,8-diyl)bis(N,N-diphenylaniline) (5j)**

**<sup>1</sup>H NMR (300 MHz)**

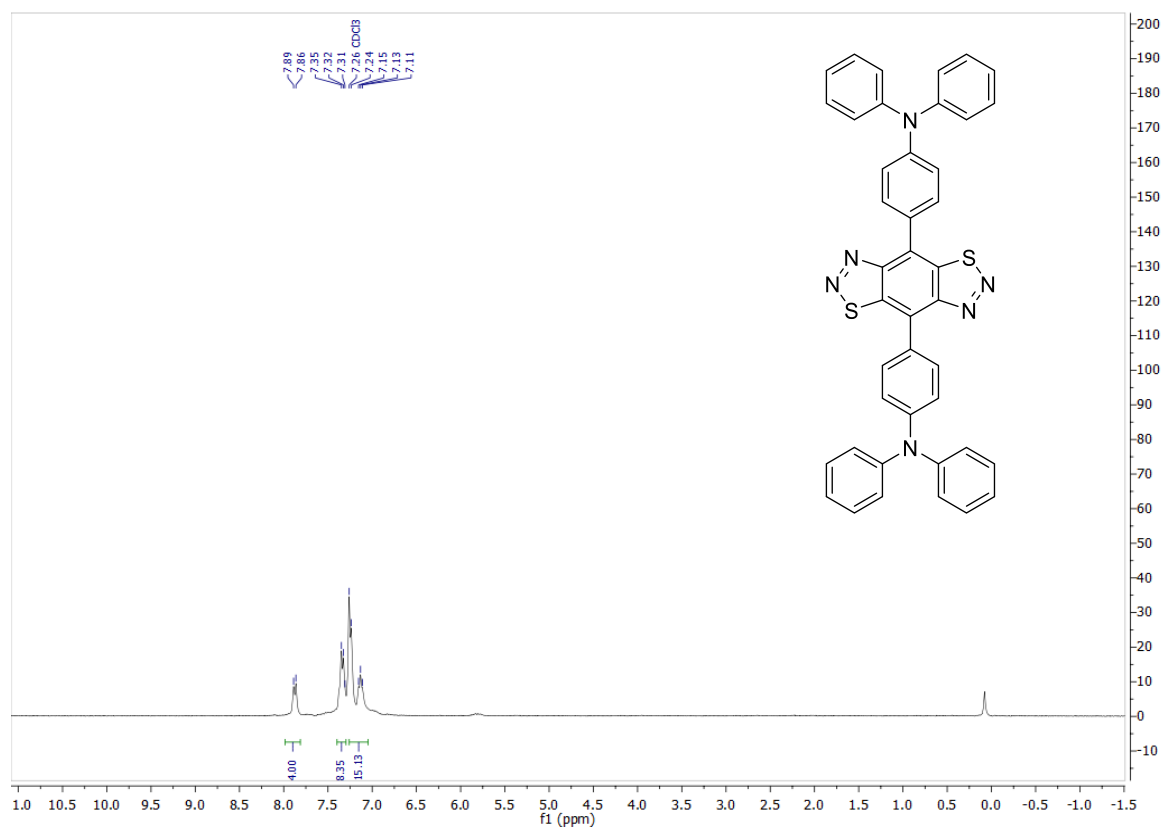

**<sup>13</sup>C NMR(75 MHz)**

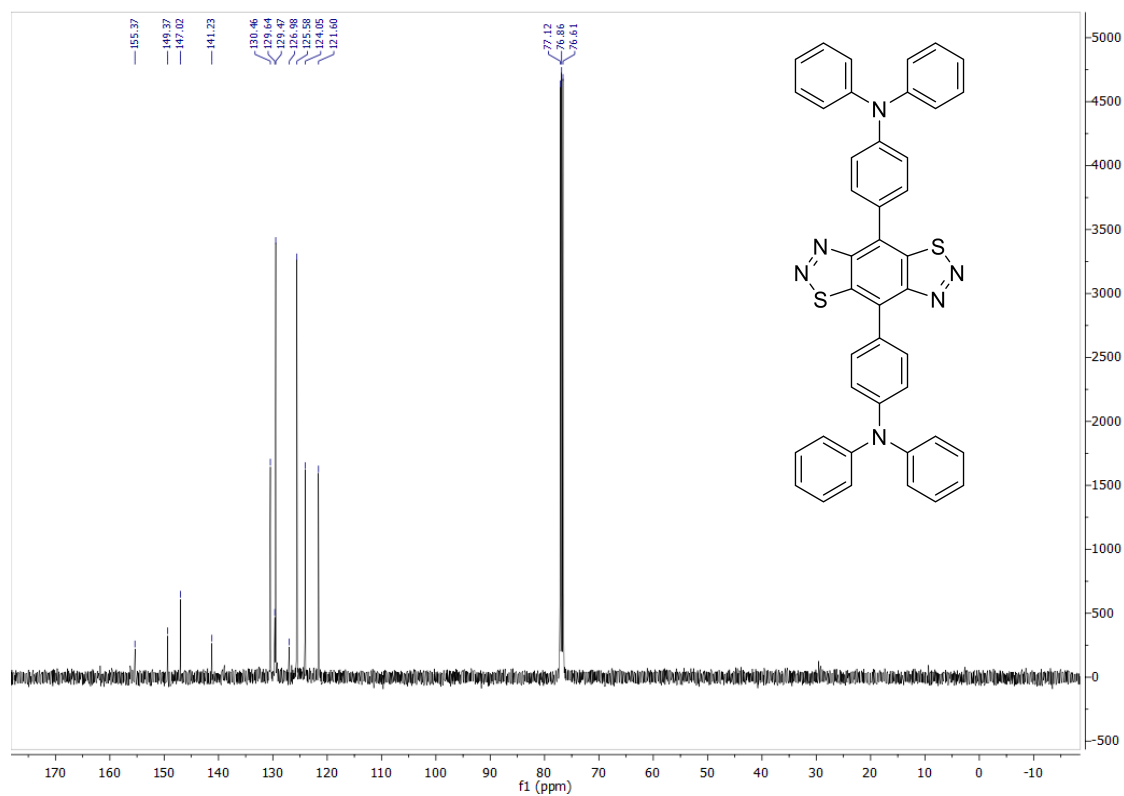

# 4-(5-(2-Ethylhexyl)thiophen-2-yl)benzo[1,2-d:4,5-d']bis([1,2,3]thiadiazole) (7a)

## <sup>1</sup>H NMR (300 MHz)

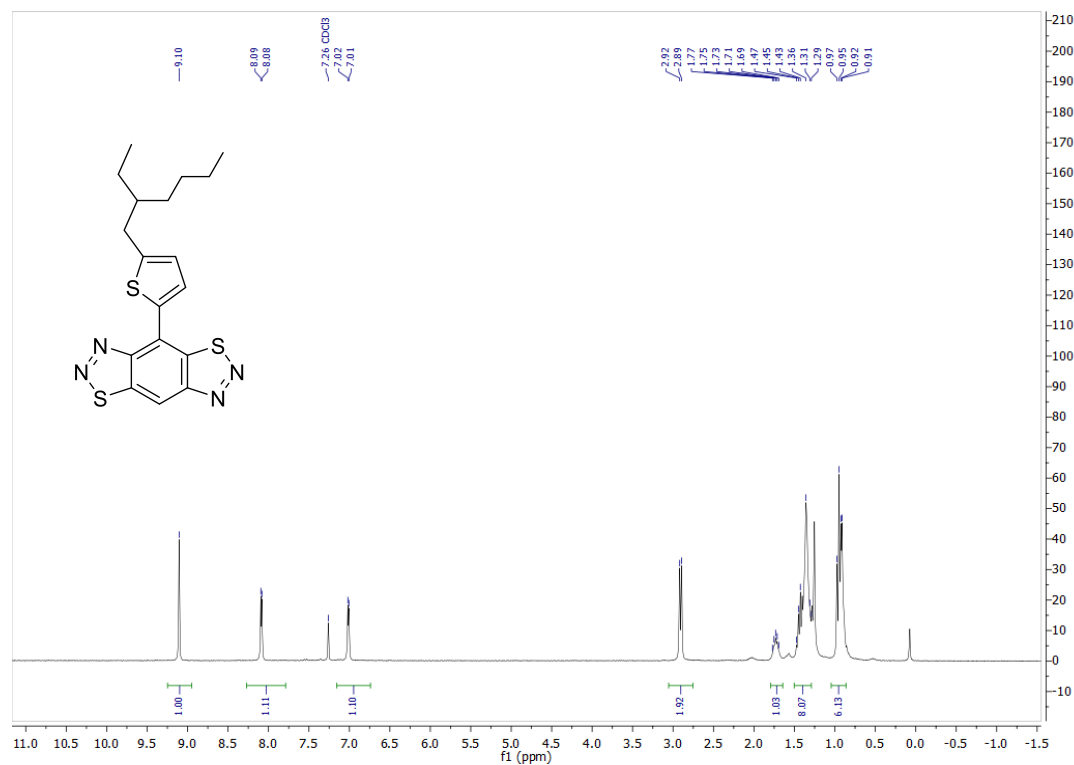

## <sup>13</sup>C NMR (75 MHz)

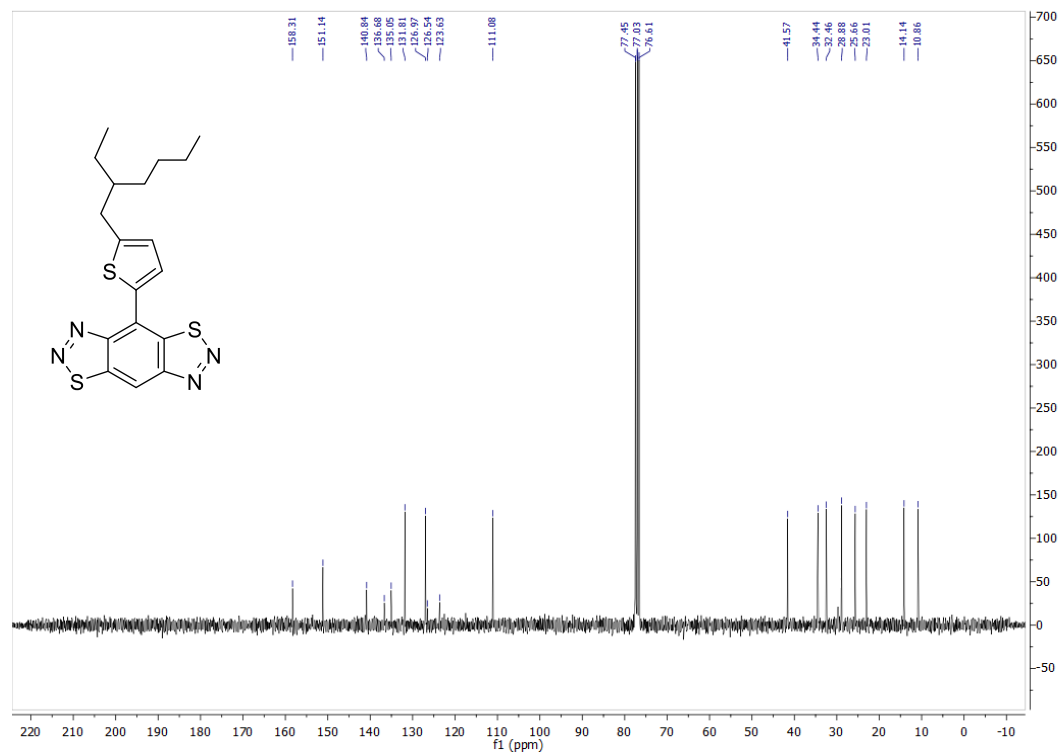



# 4-(Thiophen-2-yl)benzo[1,2-d:4,5-d']bis([1,2,3]thiadiazole) (7b)

## <sup>1</sup>H NMR (300 MHz)

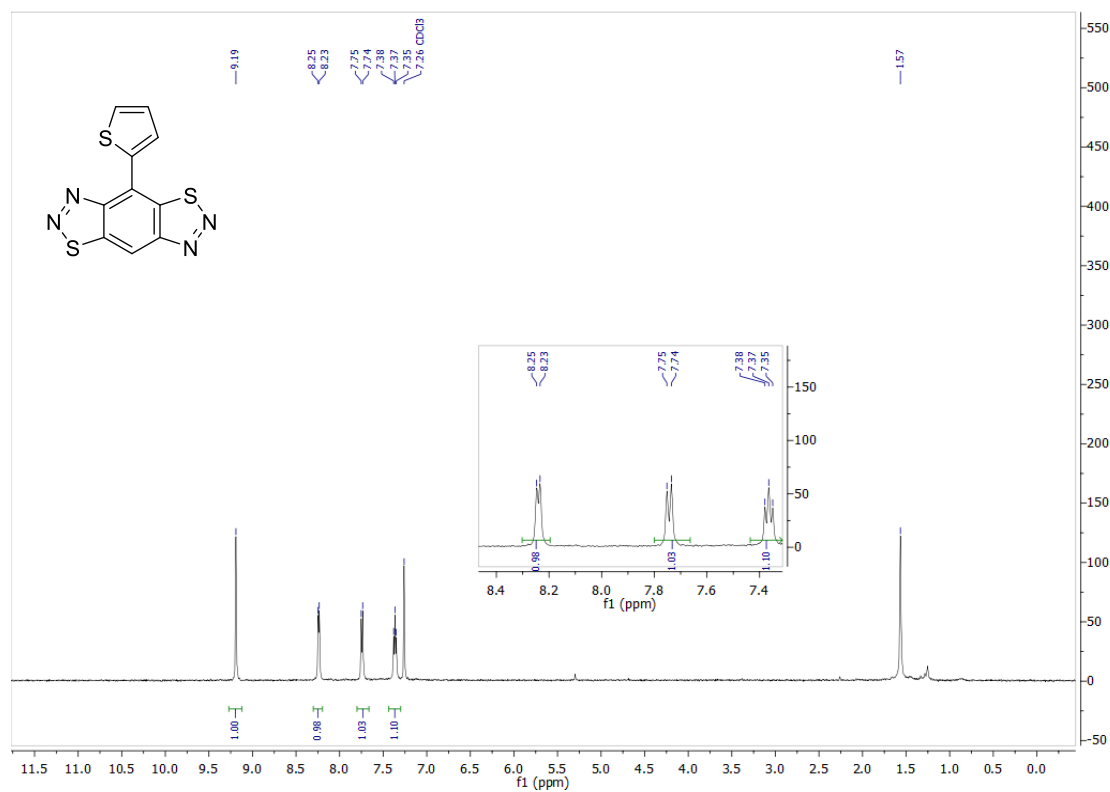

## <sup>13</sup>C NMR (75 MHz)

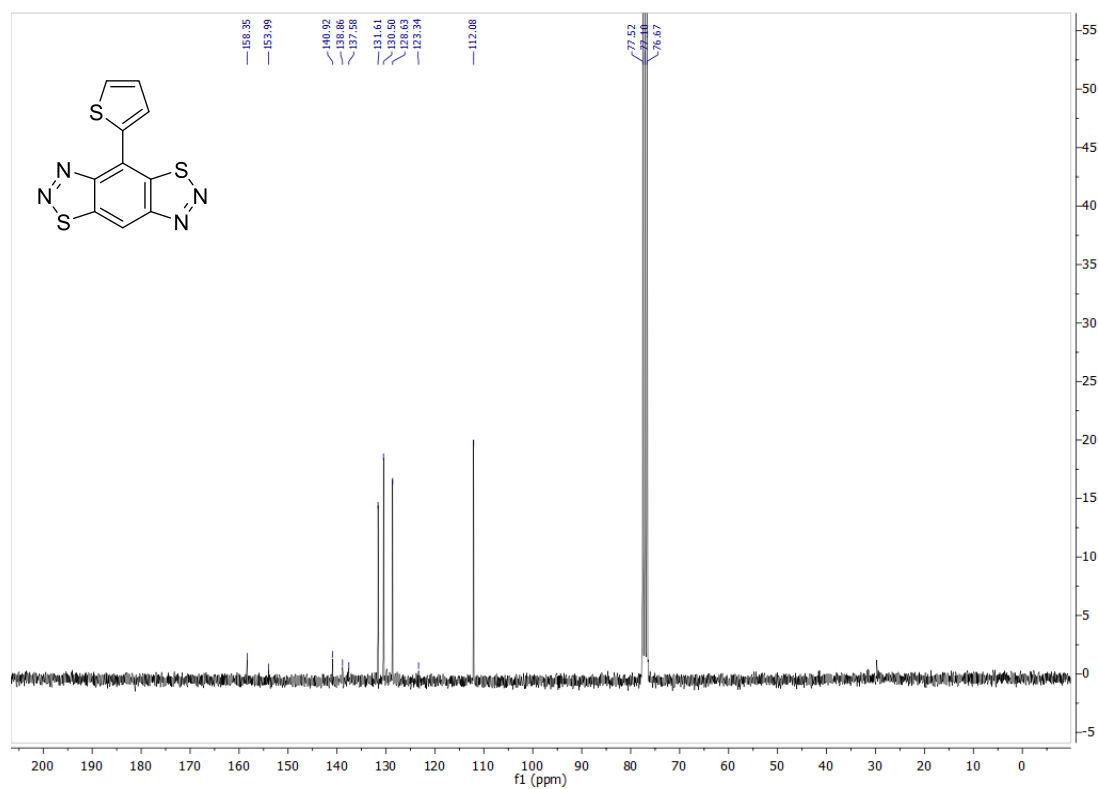

# 4-(4-Hexylthiophen-2-yl)benzo[1,2-d:4,5-d']bis([1,2,3]thiadiazole) (7c)

## <sup>1</sup>H NMR (300 MHz)

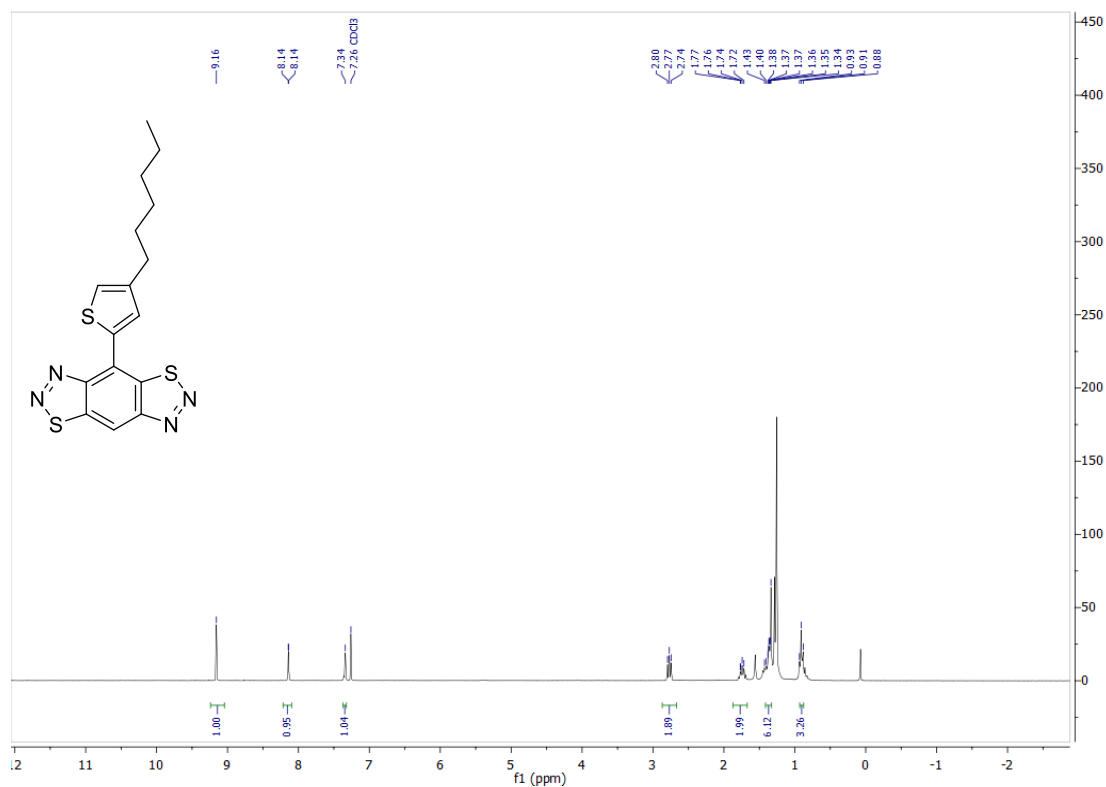

## <sup>13</sup>C NMR (75 MHz)

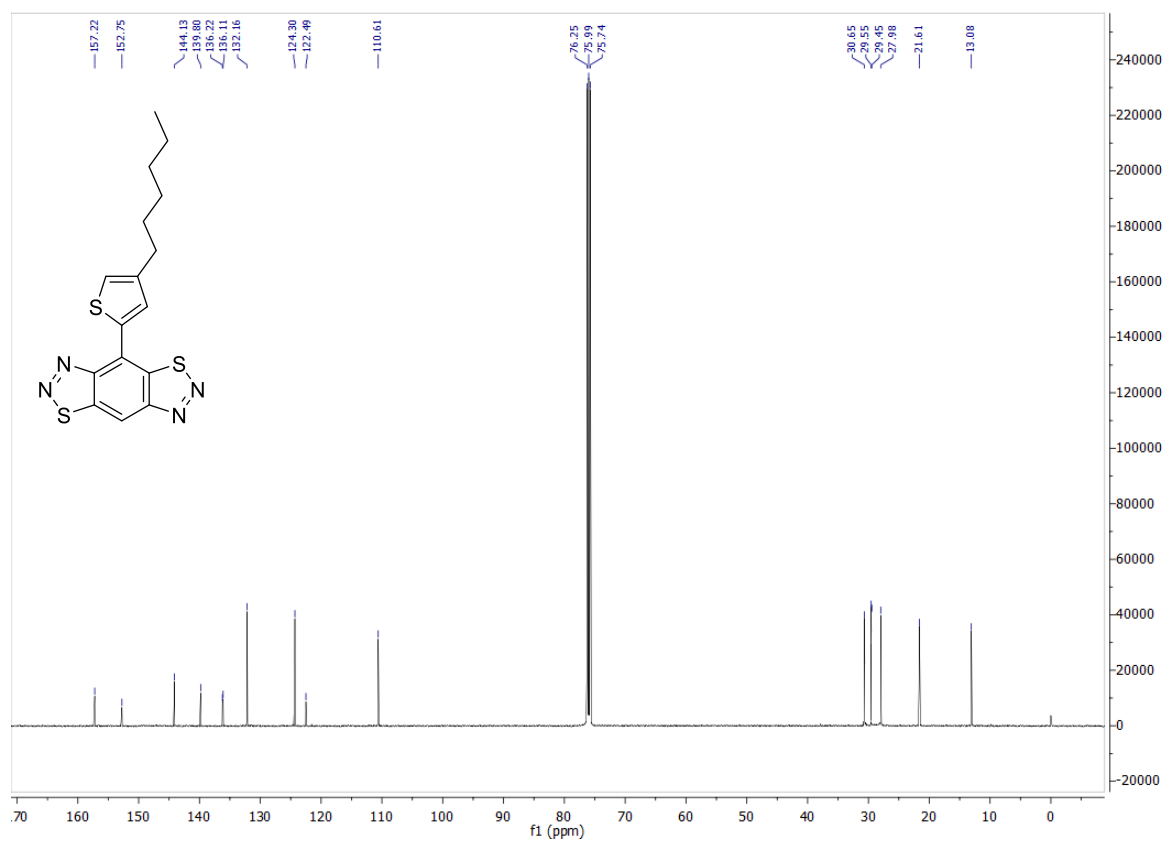

# 4-(5'-(Trimethylsilyl)-[2,2'-bithiophen]-5-yl)benzo[1,2-*d*:4,5-*d'*]bis([1,2,3]thiadiazole) (7e)

## <sup>1</sup>H NMR (300 MHz)

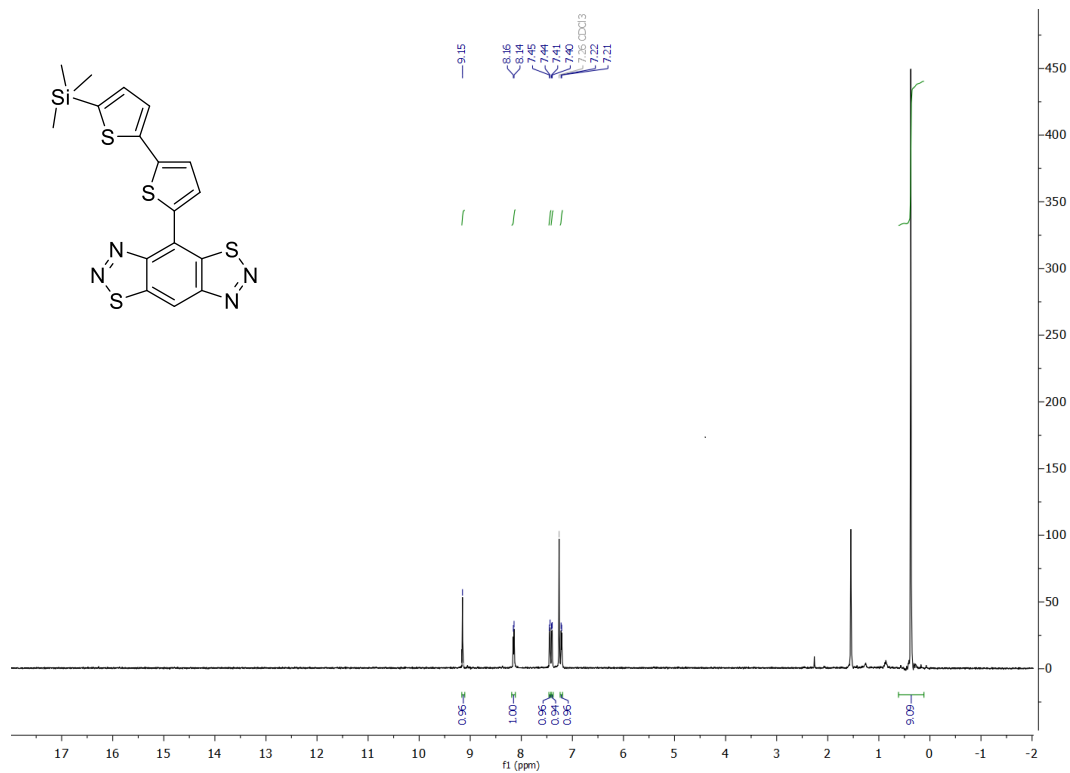

## <sup>13</sup>C NMR (75 MHz)

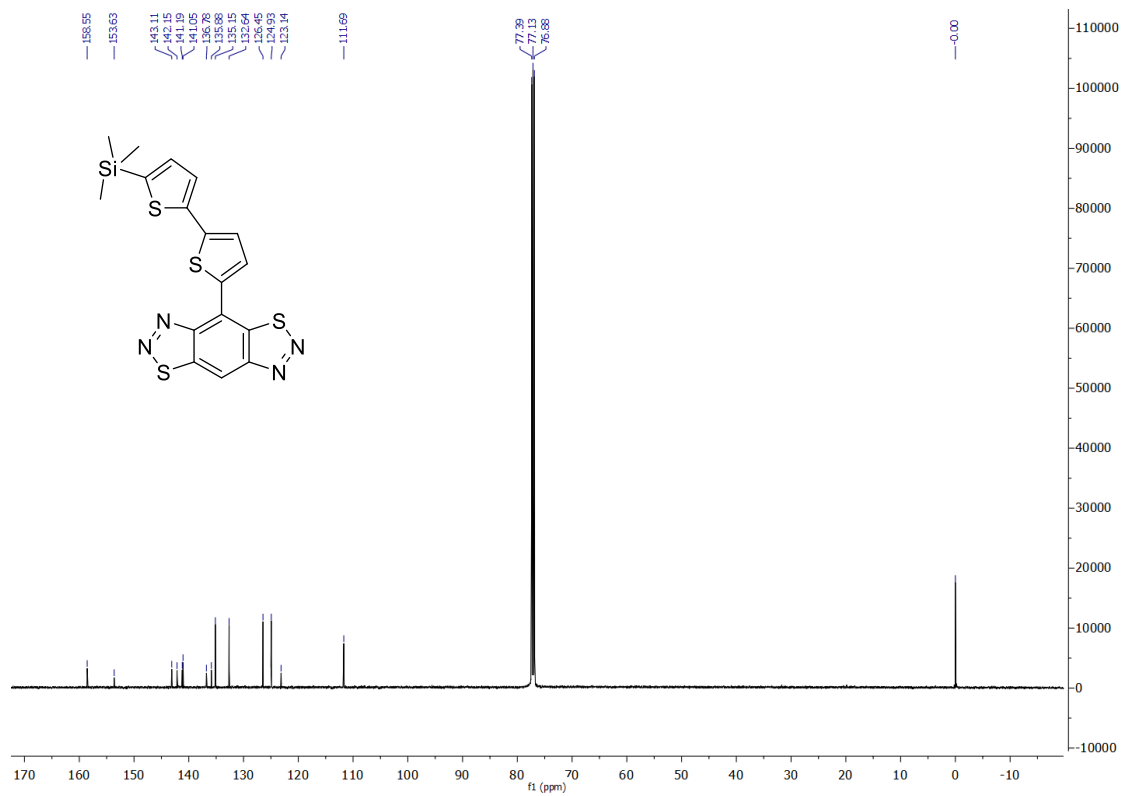

# 4-Phenylbenzo[1,2-*d*:4,5-*d'*]bis([1,2,3]thiadiazole) (7f)

## <sup>1</sup>H NMR (300 MHz)

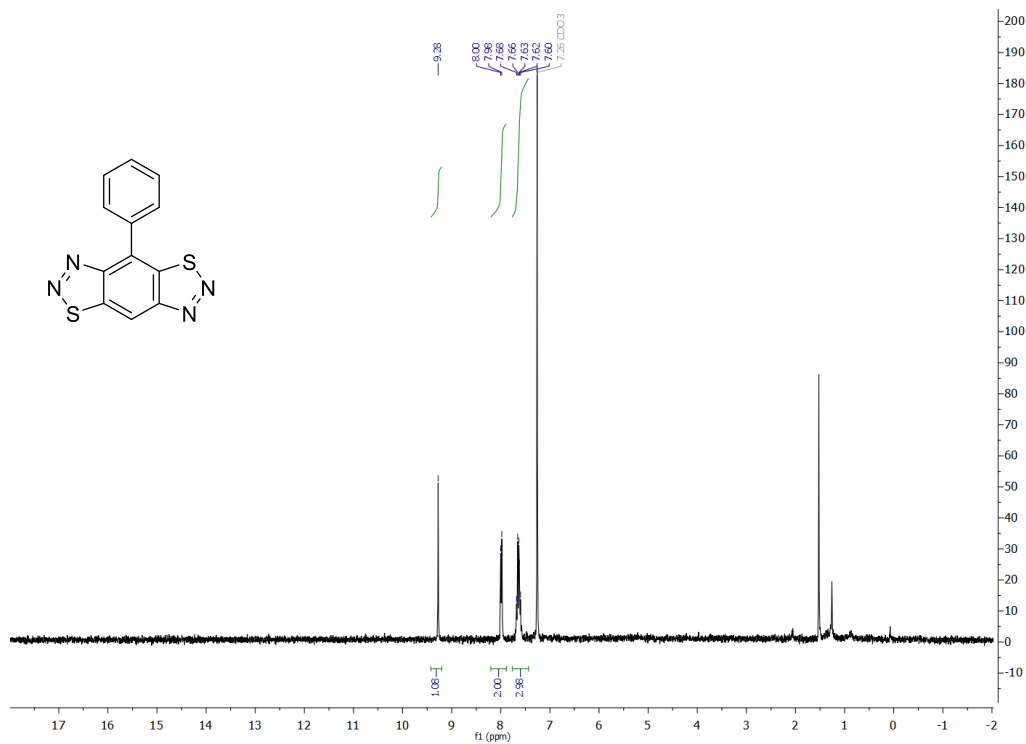

## <sup>13</sup>C NMR (75 MHz)

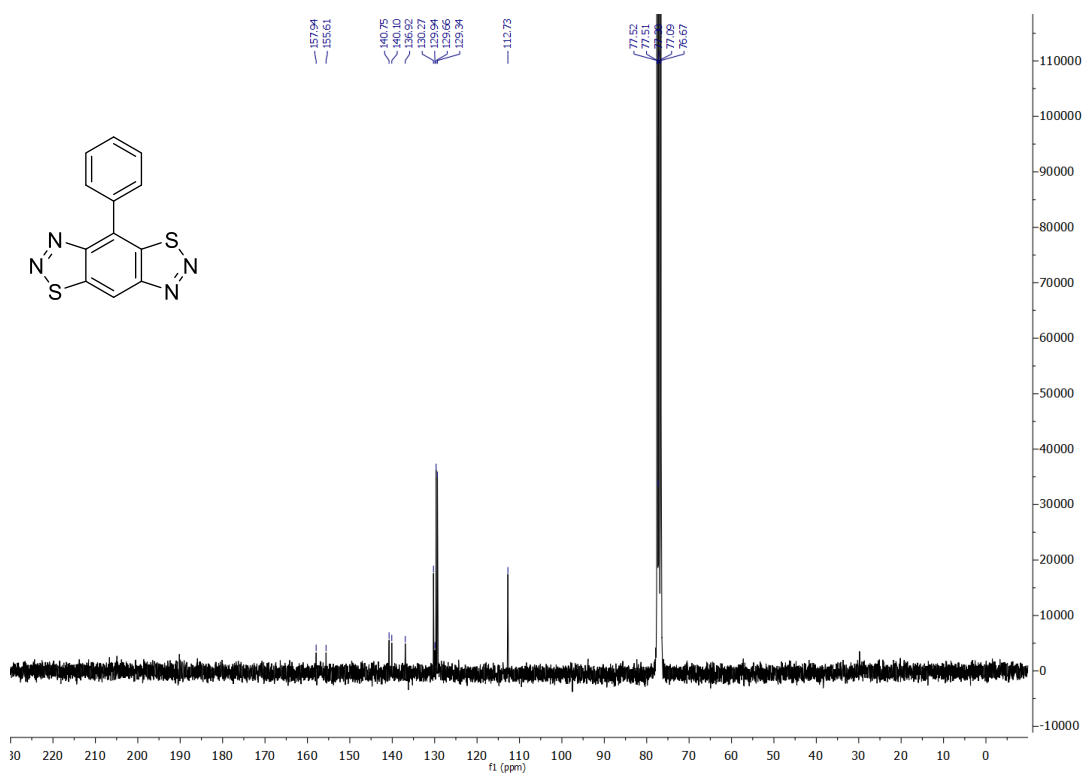

# 4-(p-Tolyl)benzo[1,2-d:4,5-d']bis([1,2,3]thiadiazole) (7g)

## <sup>1</sup>H NMR (300 MHz)

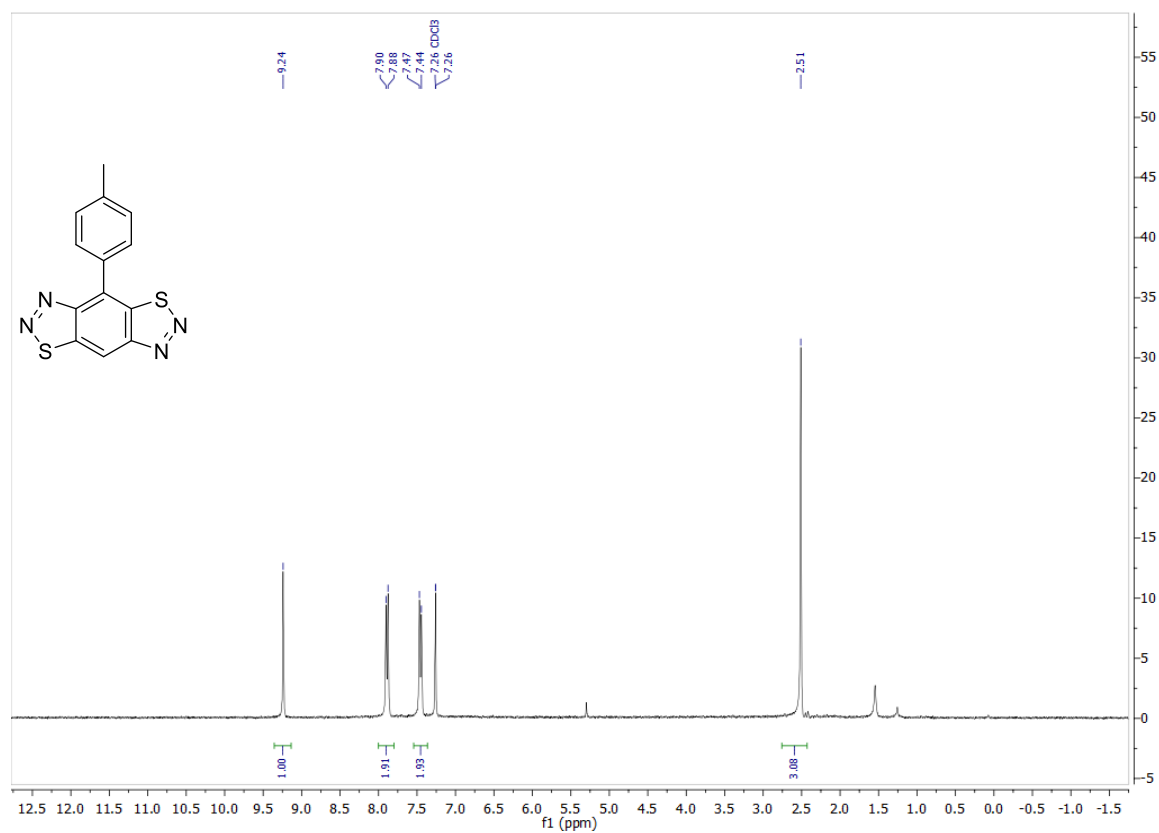

## <sup>13</sup>C NMR(75 MHz)

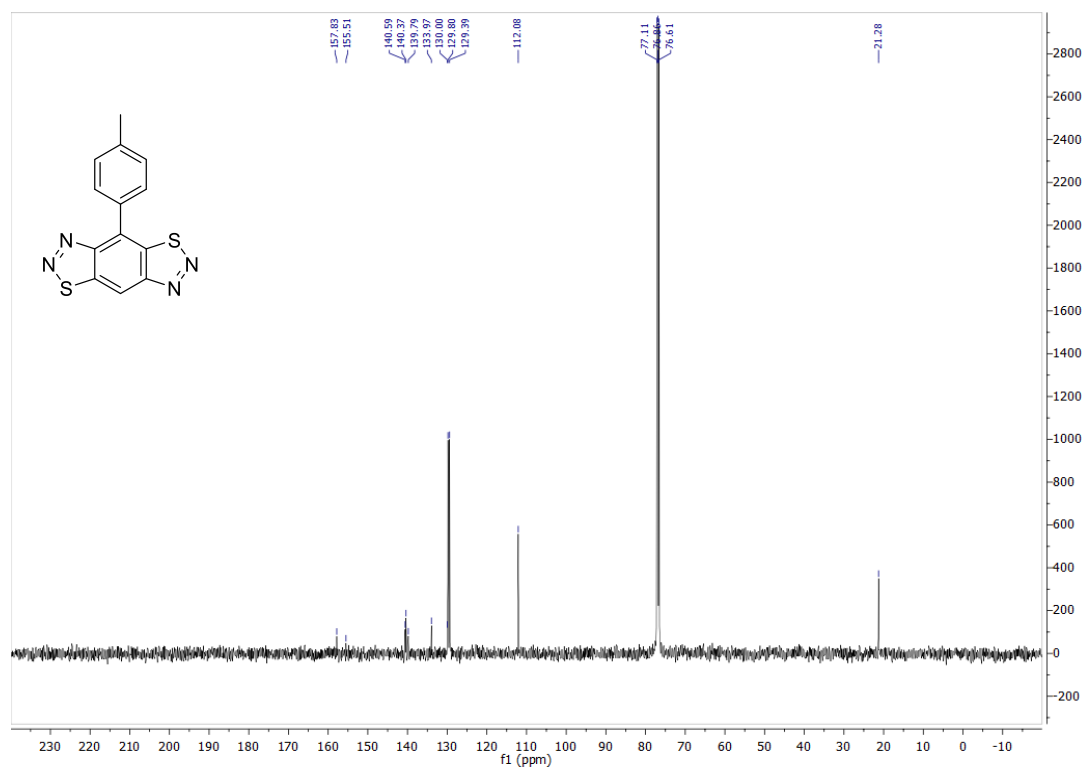

# 4-(4-Methoxyphenyl)benzo[1,2-*d*:4,5-*d'*]bis([1,2,3]thiadiazole) (7h)

## <sup>1</sup>H NMR (300 MHz)

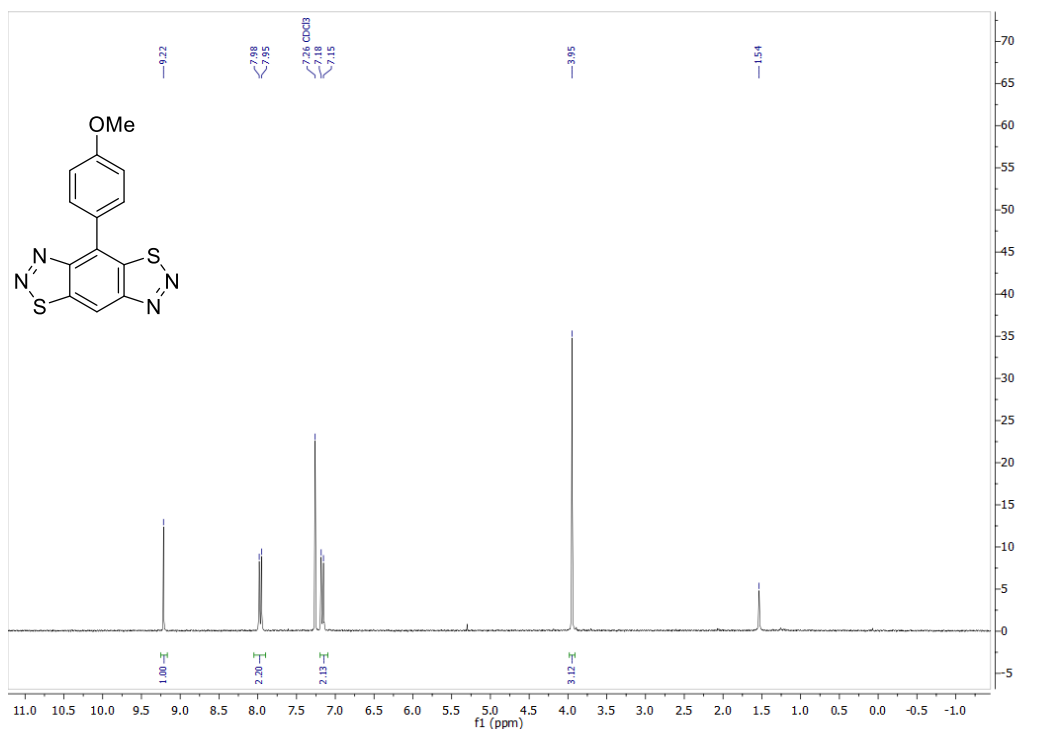

## <sup>13</sup>C NMR(75 MHz)

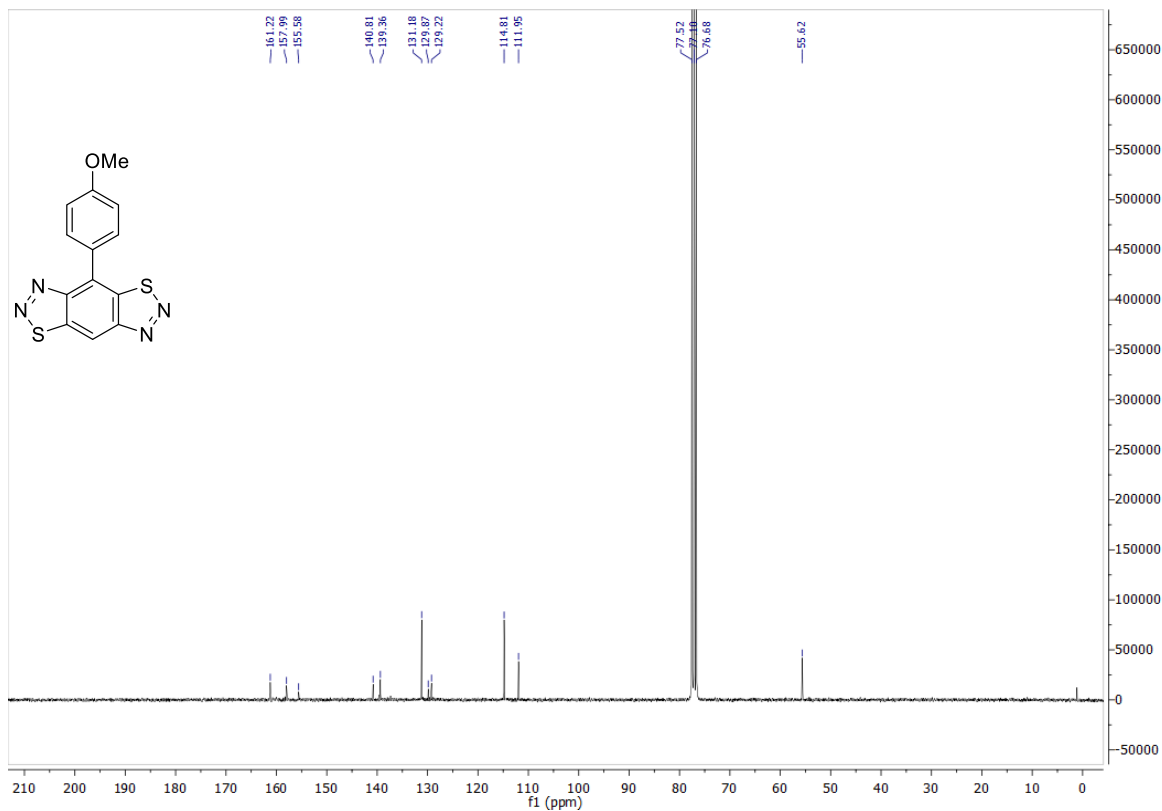

# Methyl 4-(benzo[1,2-*d*:4,5-*d'*]bis([1,2,3]thiadiazole)-4-yl)benzoate (7i)

## <sup>1</sup>H NMR (300 MHz)

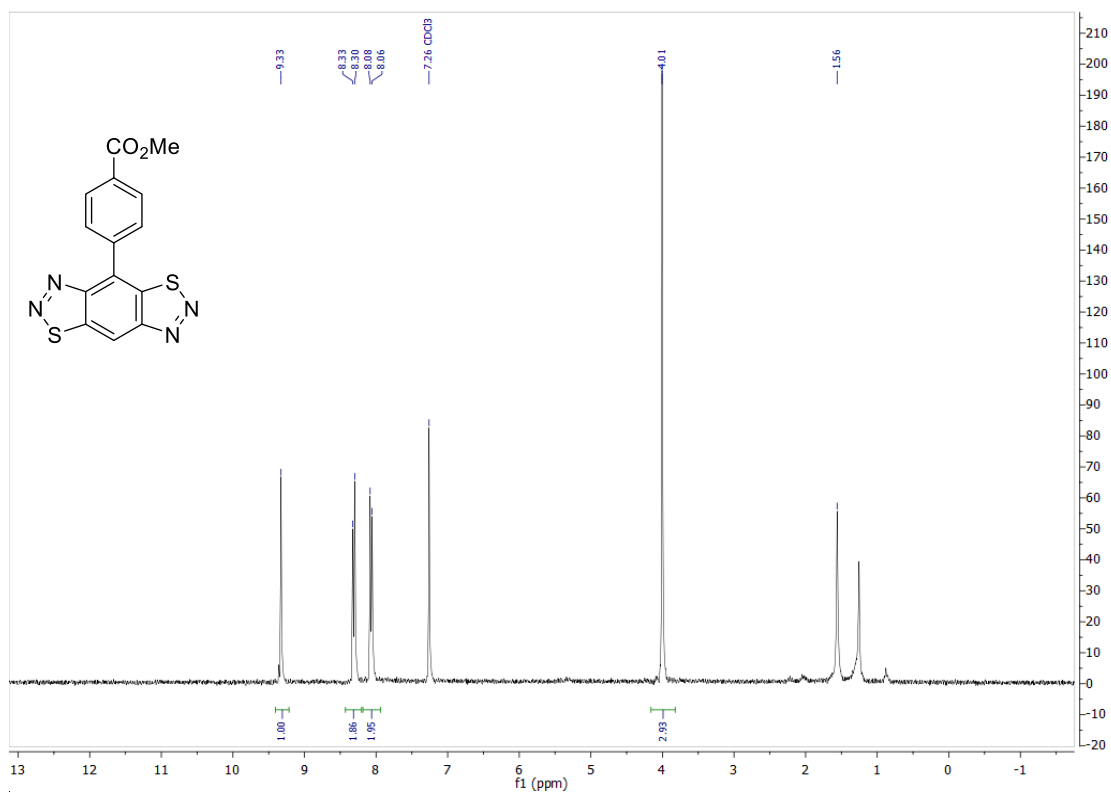

## <sup>13</sup>C NMR (75 MHz)

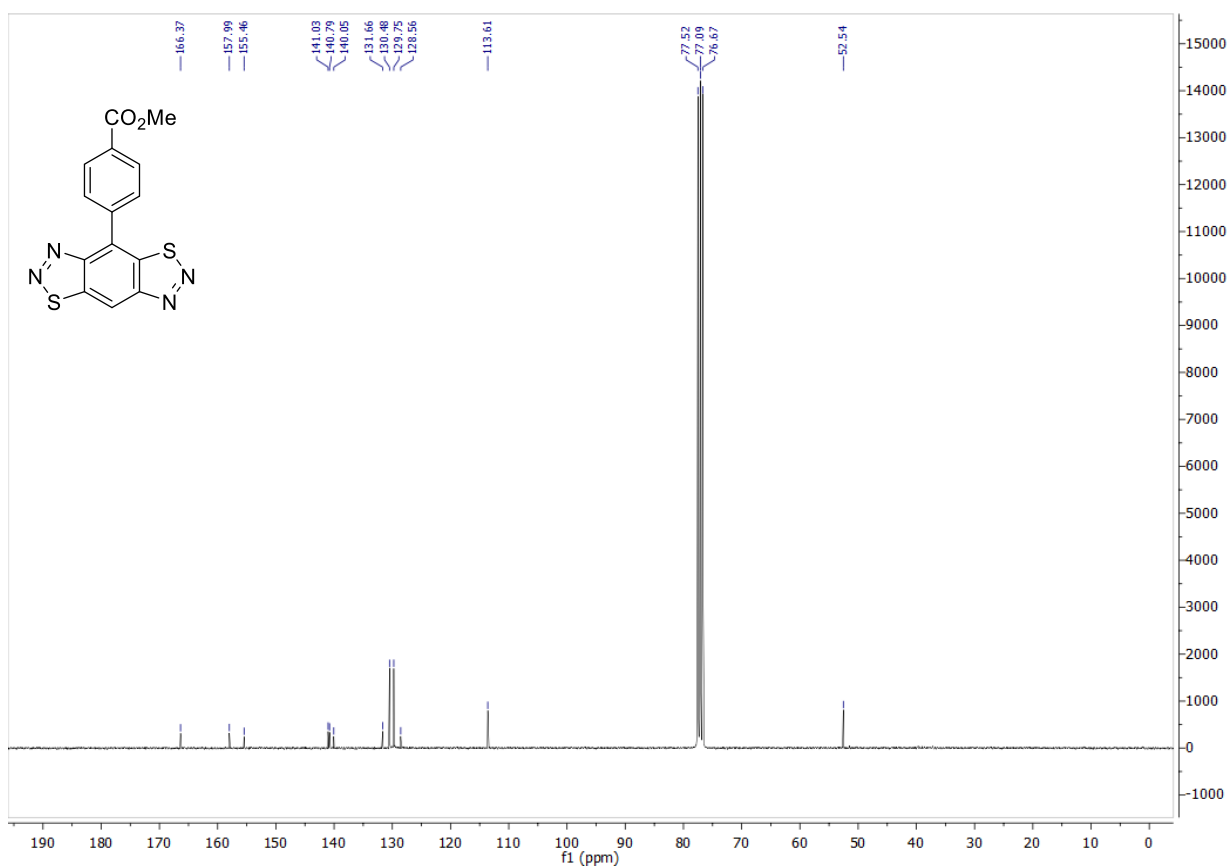

# 4-(Benzo[1,2-*d*:4,5-*d'*]bis([1,2,3]thiadiazole)-4-yl)-*N,N*-diphenylaniline (7j)

## <sup>1</sup>H NMR (300 MHz)

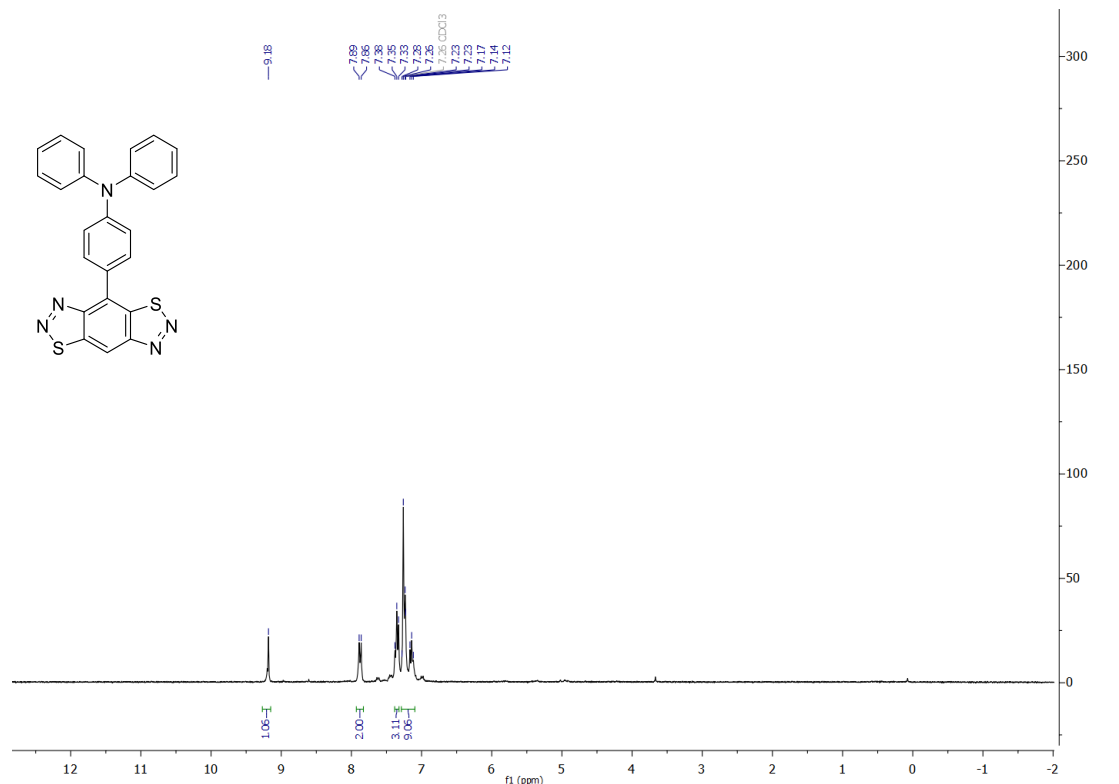

## <sup>13</sup>C NMR(75 MHz)

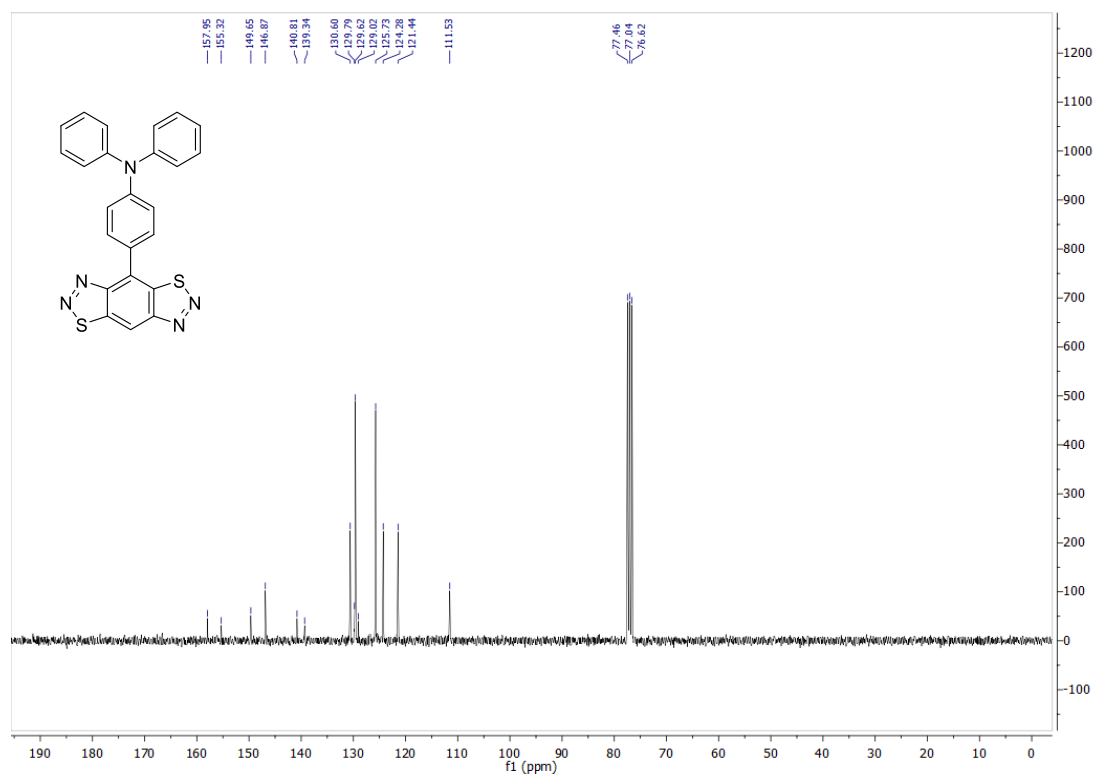

Supplement: s1 [file s1]
